# Supplementary material for: Screening of ferrocenyl–phosphines identifies a gold-coordinated derivative as a novel anticancer agent for hematological malignancies
Source: Royal Society of Chemistry journal article supplement (doi:10.1039/c8ra05224g), 2018-01-01
Supplement: c8ra05224g1.pdf [file c8ra05224g1.pdf]

---

**Electronic Supplementary Information**

---

**Screening of Ferrocenyl-Phosphines Identifies Gold-Coordinated Derivative as a Novel  
Anticancer Agent for Hematological Malignancies**

Navin Kumar Verma, Abdul Sadeer, Atish Kizhakeyil, Jia Hao Pang, Qi Yun Angela Chiu, Shan Wen  
Tay, Pankaj Kumar and Sumod A. Pullarkat

**Table of Contents**

|      |                                                                                                                  |          |
|------|------------------------------------------------------------------------------------------------------------------|----------|
| I.   | Characterization data of Ferrocenyl-phosphine derivatives FD1-10                                                 | Page S2  |
| II.  | $^1\text{H}$ , $^{31}\text{P}\{^1\text{H}\}$ , $^{19}\text{F}\{^1\text{H}\}$ & $^{13}\text{C}$ Spectra of FD1-10 | Page S5  |
| III. | Figure S1                                                                                                        | Page S21 |

## I. Characterization data of Ferrocenyl-phosphine derivatives FD1-10

**FD1:** HP procedure of the respective enone produced orange-yellow precipitates. The reaction solvent was removed *via* cannula and solids washed with cold hexanes. Subsequently, the solids were dissolved in 5 mL non-degassed dichloromethane (DCM) and left to stir at ambient atmosphere for 24 h. Thereafter, the solvent was removed under reduced pressure and crude purified on SiO<sub>2</sub>; silica gel column chromatography (DCM/E.A) to give FD1 as dull orange powder; yield: 98%. m.p. 191°C(decomp.); <sup>1</sup>H NMR (CDCl<sub>3</sub>, 400 MHz): δ 2.39 (s, 3H, - Me), 3.54 (s, 1H, Cp), 3.61 - 3.85 (m, 2H, - CH<sub>2</sub>), 3.89 (s, 1H, Cp), 3.92 (s, 5H, Cp), 4.11 (s, 1H, Cp), 4.23 (s, 1H, Cp), 4.42 (m, 1H, - CHPPH<sub>2</sub>), 7.22 - 7.26 (m, 2H, - Ar), 7.28 - 7.34 (m, 2H, - Ar), 7.35 - 7.44 (m, 4H, - Ar), 7.47 - 7.55 (m, 2H, - Ar), 7.83 - 7.90 (m, 4H, - Ar). <sup>31</sup>P{<sup>1</sup>H} NMR (CDCl<sub>3</sub>, 161.6 MHz): δ 34.0 (s). <sup>13</sup>C NMR (CDCl<sub>3</sub>, 100 MHz): δ 21.8 (-Me), 34.2 (d, - CHPPH<sub>2</sub>, <sup>1</sup>J<sub>CP</sub> = 67.0 Hz), 38.7(-CH<sub>2</sub>), 67.2 (m-Cp), 67.7 (d, o-Cp, <sup>3</sup>J<sub>CP</sub> = 1.6 Hz), 68.4 (m-Cp), 68.6 (5Cp), 70.3 (d, o-Cp, <sup>3</sup>J<sub>CP</sub> = 2.0 Hz), 85.7 (i-Cp), 128.1 (d, 2 -m Ar, <sup>3</sup>J<sub>CP</sub> = 11.5 Hz), 128.4(2 m-Ar), 128.6 (d, 2 m-Ar, <sup>3</sup>J<sub>CP</sub> = 11.2 Hz), 129.5 (2 o-Ar), 131.5 (d, 2 o-Ar, <sup>2</sup>J<sub>CP</sub> = 8.7 Hz), 131.5 (p-Ar), 131.6 (d, 2 o-Ar, <sup>2</sup>J<sub>CP</sub> = 8.7 Hz), 131.6 (d, i-Ar, <sup>1</sup>J<sub>CP</sub> = 95.0 Hz), 131.7 (d, i-Ar, <sup>1</sup>J<sub>CP</sub> = 96.0 Hz), 131.9 (d, p-Ar, <sup>4</sup>J<sub>CP</sub> = 3.1 Hz), 134.1 (p-Ar), 144.4 (i-Ar), 196.9 (d, C=O, <sup>3</sup>J<sub>CP</sub> = 7.2 Hz). HRMS m/z (+ESI) (M + H)<sup>+</sup> calcd for C<sub>32</sub>H<sub>30</sub>O<sub>2</sub>P<sub>1</sub>Fe<sub>1</sub>: 533.1333, found: 533.1334.

**FD2:** Similar procedure to FD1; dull-orange powder; yield: 98%. m.p. 198°C(decomp.); <sup>1</sup>H NMR (CDCl<sub>3</sub>, 400 MHz): δ 3.52 (s, 1H, Cp), 3.62 - 3.71 (m, 2H, - CH<sub>2</sub>), 3.90 (s, 1H, Cp), 3.97 (s, 5H, Cp), 4.12 (s, 1H, Cp), 4.22 (s, 1H, Cp), 4.30 - 4.37 (m, 1H, - CHPPH<sub>2</sub>), 7.07 - 7.14 (m, 1H, - thienyl CH), 7.28 - 7.46 (m, 6H, - Ar), 7.46 - 7.56 (m, 2H, - Ar), 7.62 (dd, 1H, <sup>3</sup>J<sub>HH</sub> = 4.9 Hz, <sup>4</sup>J<sub>HH</sub> = 0.7 Hz, - thienyl CH), 7.76 (dd, 1H, <sup>3</sup>J<sub>HH</sub> = 3.7 Hz, <sup>4</sup>J<sub>HH</sub> = 0.7 Hz, - thienyl CH), 7.82 - 7.91 (m, 2H, - Ar). <sup>31</sup>P{<sup>1</sup>H} NMR (CDCl<sub>3</sub>, 161.6 MHz): δ 33.5 (s). <sup>13</sup>C NMR (CDCl<sub>3</sub>, 100 MHz): δ 34.9 (d, - CHPPH<sub>2</sub>, <sup>1</sup>J<sub>CP</sub> = 67.3 Hz), 39.3(-CH<sub>2</sub>), 67.3 (m-Cp), 67.6 (d, o-Cp, <sup>3</sup>J<sub>CP</sub> = 2.3 Hz), 68.4 (m-Cp), 68.7 (5Cp), 70.2 (d, o-Cp, <sup>3</sup>J<sub>CP</sub> = 2.1 Hz), 85.4 (i-Cp), 128.1 (d, 2 -m Ar, <sup>3</sup>J<sub>CP</sub> = 11.7 Hz), 128.3 (thienyl Ar), 128.7 (d, 2 m-Ar, <sup>3</sup>J<sub>CP</sub> = 11.4 Hz), 131.5 (d, 2 i-Ar, <sup>1</sup>J<sub>CP</sub> = 96.9 Hz), 131.5 (d, 2 o-Ar, <sup>2</sup>J<sub>CP</sub> = 8.9 Hz), 131.6 (d, p-Ar, <sup>4</sup>J<sub>CP</sub> = 3.1 Hz), 131.7 (d, 2 o-Ar, <sup>2</sup>J<sub>CP</sub> = 9.1 Hz), 131.9 (d, p-Ar, <sup>4</sup>J<sub>CP</sub> = 2.6 Hz), 132.4 (thienyl Ar), 134.2 (thienyl Ar), 143.7 (thienyl Ar), 190.4 (d, C=O, <sup>3</sup>J<sub>CP</sub> = 7.3 Hz). HRMS m/z (+ESI) (M + H)<sup>+</sup> calcd for C<sub>29</sub>H<sub>26</sub>O<sub>2</sub>P<sub>1</sub>S<sub>1</sub>Fe<sub>1</sub>: 525.0741, found: 525.0742.

**FD3:** Similar procedure to FD1; dull-orange powder; yield: 90%. m.p. 180°C(decomp.); <sup>1</sup>H NMR (CDCl<sub>3</sub>, 400 MHz): δ 3.50 - 3.58 (m, 1H, - CH), 3.62 (m, 1H, Cp), 3.73 - 3.86 (m, 1H, - CH), 3.90 (s, 1H, Cp), 3.98 (m, 1H, Cp), 4.06 - 4.12 (m, 6H, Cp), 4.52 (m, 1H, - CHPPH<sub>2</sub>), 7.31 - 7.39 (m, 3H, - Ar), 7.43 - 7.58 (m, 6H, - Ar), 7.75 - 7.84 (m, 2H, - Ar), 7.86 - 7.94 (m, 2H, - Ar). <sup>19</sup>F{<sup>1</sup>H} NMR (CDCl<sub>3</sub>, 282.2 MHz): δ -62.99 (s), -58.41 (s). <sup>31</sup>P{<sup>1</sup>H} NMR (CDCl<sub>3</sub>, 161.6 MHz): δ 32.5 (s). <sup>13</sup>C NMR (CDCl<sub>3</sub>, 100 MHz): δ 35.7 (d, - CHPPH<sub>2</sub>, <sup>1</sup>J<sub>CP</sub> = 64.6 Hz), 43.9(-CH<sub>2</sub>), 67.7 (m-Cp), 67.9 (o-Cp), 68.4 (m-Cp), 68.8 (5Cp), 69.9 (d, o-Cp, <sup>3</sup>J<sub>CP</sub> = 1.7 Hz), 85.1 (i-Cp), 122.9 (q, CF<sub>3</sub>, <sup>1</sup>J<sub>CF</sub> = 273.2 Hz), 123.1 (q, CF<sub>3</sub>, <sup>1</sup>J<sub>CF</sub> = 273.9 Hz), 125.2(m, p-Ar), 127.0 (q, m-Ar, <sup>3</sup>J<sub>CF</sub> = 3.9 Hz), 127.3 (q, m-Ar, <sup>3</sup>J<sub>CF</sub> = 5.1 Hz), 128.1 (d, 2 -m Ar, <sup>3</sup>J<sub>CP</sub> = 11.5 Hz), 128.8 (d, 2 -m Ar, <sup>3</sup>J<sub>CP</sub> = 11.3 Hz), 129.7 (d, i-Ar, <sup>1</sup>J<sub>CP</sub> = 97.7 Hz), 130.4 (d, i-Ar, <sup>1</sup>J<sub>CP</sub> = 100.3 Hz), 131.5 (d, 2 o-Ar, <sup>2</sup>J<sub>CP</sub> = 9.0 Hz), 132.0 (m, p-Ar), 132.3 (d, 2 o-Ar, <sup>2</sup>J<sub>CP</sub> = 8.8 Hz), 132.4 (d, p-Ar, <sup>4</sup>J<sub>CP</sub> = 2.2 Hz), 134.3 (q, 2 m-Ar, <sup>2</sup>J<sub>CF</sub> = 33.0 Hz), 141.2 (i-Ar), 200.1 (s, C=O). HRMS m/z (+ESI) (M + H)<sup>+</sup> calcd for C<sub>33</sub>H<sub>26</sub>O<sub>2</sub>F<sub>6</sub>P<sub>1</sub>Fe<sub>1</sub>: 655.0924, found: 655.0927.

**FD4:** HP procedure of the respective enone produced orange-yellow precipitates. The reaction solvent was removed *via* cannula and solids washed with cold hexanes. Thereafter, 1.2 equivalent of Sulphur was added and solids dissolved in 5 mL degassed DCM. The solution was left for 24 h. Thereafter, the solvent was removed under reduced pressure and crude purified on SiO<sub>2</sub>; silica gel column chromatography (Hexane/E.A); orange powder; yield: 90%. m.p. 190°C(decomp.); <sup>1</sup>H NMR (CDCl<sub>3</sub>, 400 MHz): δ 2.40 (s, 3H, - Me), 3.38 (s, 1H, Cp), 3.61 - 3.80 (m, 2H, - CH<sub>2</sub>), 3.85 (s, 1H, Cp), 3.92 (s, 5H, Cp), 4.12 (s, 1H, Cp), 4.33 (s, 1H, Cp), 4.82 (m, 1H, - CHPPH<sub>2</sub>), 7.22 - 7.24 (m, 2H, - Ar), 7.24 - 7.26 (m, 2H, - Ar), 7.28 - 7.43 (m, 6H, - Ar), 7.59 - 7.67 (m, 2H, - Ar), 7.87 - 7.92 (m, 2H, - Ar), 8.00 - 8.10 (m, 2H, - Ar). <sup>31</sup>P{<sup>1</sup>H} NMR (CDCl<sub>3</sub>, 161.6 MHz): δ 53.5 (s). <sup>13</sup>C NMR (CDCl<sub>3</sub>, 100 MHz): δ 21.7 (-Me), 35.9 (d, - CHPPH<sub>2</sub>, <sup>1</sup>J<sub>CP</sub> = 51.7 Hz), 39.6 (d, - CH<sub>2</sub>, <sup>2</sup>J<sub>CP</sub> = 4.6 Hz), 67.1 (m-Cp), 68.1 (d, o-Cp, <sup>3</sup>J<sub>CP</sub> = 1.7 Hz), 68.2 (m-Cp), 68.6 (5Cp), 70.2 (d, o-Cp, <sup>3</sup>J<sub>CP</sub> = 1.9 Hz), 85.3 (i-Cp), 127.9 (d, 2 -m Ar, <sup>3</sup>J<sub>CP</sub> = 12.1 Hz), 128.3(2 m-Ar), 128.5 (d, 2 m-Ar, <sup>3</sup>J<sub>CP</sub> = 11.5 Hz), 129.4 (2 o-Ar), 131.0 (d, i-Ar, <sup>1</sup>J<sub>CP</sub> = 74.5 Hz), 131.2 (d, i-Ar, <sup>1</sup>J<sub>CP</sub> = 79.4 Hz), 131.3 (d, p-Ar, <sup>4</sup>J<sub>CP</sub> = 2.9 Hz), 131.6 (d, p-Ar, <sup>4</sup>J<sub>CP</sub> = 2.9 Hz), 132.0(d, 2 o-Ar, <sup>2</sup>J<sub>CP</sub> = 9.4 Hz), 132.2 (d, 2 o-Ar, <sup>2</sup>J<sub>CP</sub> = 9.6 Hz), 134.0 (p-Ar), 144.4 (i-Ar), 196.8 (d, C=O, <sup>3</sup>J<sub>CP</sub> = 7.9 Hz). HRMS m/z (+ESI) (M + H)<sup>+</sup> calcd for C<sub>32</sub>H<sub>30</sub>O<sub>1</sub>P<sub>1</sub>S<sub>1</sub>Fe<sub>1</sub>: 549.1104, found: 533.1107.

**FD5:** Similar procedure to FD4; orange powder; yield: 90%. m.p. 205°C(decomp.);  $^1\text{H}$  NMR ( $\text{CDCl}_3$ , 400 MHz):  $\delta$  3.35 (s, 1H, Cp), 3.58 - 3.76 (m, 2H, -CH<sub>2</sub>), 3.87 (s, 1H, Cp), 3.97 (s, 5H, Cp), 4.14 (s, 1H, Cp), 4.31 (s, 1H, Cp), 4.68 - 4.76 (m, 1H, -CHPPH<sub>2</sub>), 7.08 - 7.13 (m, 1H, -thienyl CH), 7.28 - 7.45 (m, 6H, -Ar), 7.60 - 7.69 (m, 3H, -2Ar & -thienyl CH), 7.80 (m, 1H, -thienyl CH), 8.00 - 8.10 (m, 2H, -Ar).  $^{31}\text{P}\{^1\text{H}\}$  NMR ( $\text{CDCl}_3$ , 161.6 MHz):  $\delta$  53.7 (s).  $^{13}\text{C}$  NMR ( $\text{CDCl}_3$ , 100 MHz):  $\delta$  36.7 (d, -CHPPH<sub>2</sub>,  $^1J_{\text{CP}} = 51.3$  Hz), 40.1 (d, -CH<sub>2</sub>,  $^2J_{\text{CP}} = 4.1$  Hz), 67.2 (m-Cp), 68.1 (d, o-Cp,  $^3J_{\text{CP}} = 1.4$  Hz), 68.2 (m-Cp), 68.7 (5Cp), 70.1 (d, o-Cp,  $^3J_{\text{CP}} = 1.7$  Hz), 85.1 (i-Cp), 128.0 (d, 2 -m Ar,  $^3J_{\text{CP}} = 12.1$  Hz), 128.3(thienyl Ar), 128.5 (d, 2 m-Ar,  $^3J_{\text{CP}} = 11.5$  Hz), 130.8 (d, 2 i-Ar,  $^1J_{\text{CP}} = 74.4$  Hz), 131.5 (d, 2 i-Ar,  $^1J_{\text{CP}} = 80.0$  Hz), 131.4 (d, p-Ar,  $^4J_{\text{CP}} = 3.2$  Hz), 131.7 (d, p-Ar,  $^4J_{\text{CP}} = 2.8$  Hz), 131.2 (d, 2 o-Ar,  $^2J_{\text{CP}} = 8.9$  Hz), 131.3 (d, 2 o-Ar,  $^2J_{\text{CP}} = 10.0$  Hz), 132.6 (thienyl Ar), 134.4 (thienyl Ar), 143.7 (thienyl Ar), 190.4 (d, C=O,  $^3J_{\text{CP}} = 7.8$  Hz). HRMS m/z (+ESI) (M + H)<sup>+</sup> calcd for C<sub>29</sub>H<sub>26</sub>O<sub>2</sub>P<sub>1</sub>S<sub>2</sub>Fe<sub>1</sub>: 557.0461, found: 557.0423.

**FD6:** HP procedure gave a light purple solution. 1.2 equivalent of Sulphur was added to the crude and washed with degassed DCM. Thereafter, the solution was left to stir for 24 h. The solvent was then removed under reduced pressure and crude purified on SiO<sub>2</sub>; silica gel column chromatography (Hexane/E.A); orange powder; yield: 60%. m.p. 145°C;  $^1\text{H}$  NMR ( $\text{CDCl}_3$ , 400 MHz):  $\delta$  1.11 (d, 3H,  $^3J_{\text{HH}} = 6.2$  Hz, -Me), 1.20 (d, 3H,  $^3J_{\text{HH}} = 6.3$  Hz, -Me), 1.27 (d, 3H,  $^3J_{\text{HH}} = 6.2$  Hz, -Me), 1.31 (d, 3H,  $^3J_{\text{HH}} = 6.3$  Hz, -Me), 3.42 (s, 1H, Cp), 3.90 (s, 1H, Cp), 4.04 (s, 5H, Cp), 4.11 (s, 1H, Cp), 4.19 (s, 1H, Cp), 4.50 (dd, 1H,  $^3J_{\text{HH}} = 3.6$  Hz,  $^2J_{\text{HP}} = 18.8$  Hz, -CHPPH<sub>2</sub>), 4.79 (dd, 1H,  $^3J_{\text{HH}} = 3.6$  Hz,  $^3J_{\text{HP}} = 12.8$  Hz, -CH), 4.87 (sep, 1H,  $^3J_{\text{HH}} = 6.3$  Hz, -CH), 5.10 (sep, 1H,  $^3J_{\text{HH}} = 6.3$  Hz, -CH), 7.27 - 7.32 (m, 2H, -Ar), 7.35 - 7.49 (m, 4H, -Ar), 7.55 - 7.64 (m, 2H, -Ar), 7.88 - 7.97 (m, 2H, -Ar).  $^{31}\text{P}\{^1\text{H}\}$  NMR ( $\text{CDCl}_3$ , 161.6 MHz):  $\delta$  47.9 (s).  $^{13}\text{C}$  NMR ( $\text{CDCl}_3$ , 100 MHz):  $\delta$  21.5 (-Me), 21.7 (2 -Me), 21.8 (-Me), 42.3 (d, -CHPPH<sub>2</sub>,  $^1J_{\text{CP}} = 50.0$  Hz), 56.4 (d, -CH,  $^2J_{\text{CP}} = 2.2$  Hz), 67.3 (-CH), 67.4 (-CH), 67.0 (o-Cp & 5 Cp), 69.5 (m-Cp), 70.1 (m-Cp), 70.7 (d, o-Cp,  $^3J_{\text{CP}} = 1.7$  Hz), 86.2 (i-Cp), 127.6 (d, 2 -m Ar,  $^3J_{\text{CP}} = 12.0$  Hz), 128.3 (d, 2 m-Ar,  $^3J_{\text{CP}} = 12.0$  Hz), 131.0 (d, p-Ar,  $^4J_{\text{CP}} = 2.9$  Hz), 131.1 (d, p-Ar,  $^4J_{\text{CP}} = 2.9$  Hz), 131.1 (d, i-Ar,  $^1J_{\text{CP}} = 80.9$  Hz), 132.0 (d, 2 o-Ar,  $^2J_{\text{CP}} = 9.8$  Hz), 133.2 (d, 2 o-Ar,  $^2J_{\text{CP}} = 9.5$  Hz), 134.6 (d, i-Ar,  $^1J_{\text{CP}} = 78.5$  Hz), 167.1 (d, C=O,  $^3J_{\text{CP}} = 5.6$  Hz), 168.5 (d, C=O,  $^3J_{\text{CP}} = 4.9$  Hz). HRMS m/z (+ESI) (M + H)<sup>+</sup> calcd for C<sub>32</sub>H<sub>36</sub>O<sub>4</sub>P<sub>1</sub>S<sub>1</sub>Fe<sub>1</sub>: 603.1421, found: 603.1423.

**FD7:** HP procedure gave a light purple solution. To the reaction vessel was added non-degassed DCM and left to stir under ambient atmospheric conditions for 24 h. The solvent was then removed under reduced pressure and crude purified on SiO<sub>2</sub>; silica gel column chromatography (Hexane/E.A); orange-yellow; yield: 60%. m.p. 149°C;  $^1\text{H}$  NMR ( $\text{CDCl}_3$ , 400 MHz):  $\delta$  1.18 (m, 6H, -Me), 1.29 (d, 6H, -Me), 3.73 (s, 1H, Cp), 3.97 - 4.00 (m, 2H, Cp), 4.05 (s, 5H, Cp), 4.07 (s, 1H, Cp), 4.32 (dd, 1H,  $^3J_{\text{HH}} = 3.7$  Hz,  $^2J_{\text{HP}} = 20.0$  Hz, -CHPPH<sub>2</sub>), 4.46 (dd, 1H,  $^3J_{\text{HH}} = 3.6$  Hz,  $^3J_{\text{HP}} = 14.4$  Hz, -CH), 4.95 (sep, 1H,  $^3J_{\text{HH}} = 6.3$  Hz, -CH), 5.08 (sep, 1H,  $^3J_{\text{HH}} = 5.9$  Hz, -CH), 7.27 - 7.35 (m, 2H, -Ar), 7.37 - 7.55 (m, 6H, -Ar), 7.71 - 7.81 (m, 2H, -Ar).  $^{31}\text{P}\{^1\text{H}\}$  NMR ( $\text{CDCl}_3$ , 161.6 MHz):  $\delta$  30.5 (s).  $^{13}\text{C}$  NMR ( $\text{CDCl}_3$ , 100 MHz):  $\delta$  21.5 (-Me), 21.7 (-Me), 21.8 (-Me), 21.8 (-Me), 41.2 (d, -CHPPH<sub>2</sub>,  $^1J_{\text{CP}} = 67.1$  Hz), 56.0 (d, -CH), 67.7 (-CH), 68.3 (-CH), 68.6 (d, o-Cp,  $^3J_{\text{CP}} = 3.0$  Hz), 67.0 (5 Cp), 69.3 (m-Cp), 70.0 (m-Cp), 69.3 (o-Cp), 85.0 (i-Cp), 127.7 (d, 2 -m Ar,  $^3J_{\text{CP}} = 11.7$  Hz), 128.3 (d, 2 m-Ar,  $^3J_{\text{CP}} = 11.4$  Hz), 131.2 (d, p-Ar,  $^4J_{\text{CP}} = 2.6$  Hz), 131.5 (d, p-Ar,  $^4J_{\text{CP}} = 2.5$  Hz), 131.6 (d, i-Ar,  $^1J_{\text{CP}} = 99.7$  Hz), 131.9 (d, 2 o-Ar,  $^2J_{\text{CP}} = 9.0$  Hz), 132.7 (d, 2 o-Ar,  $^2J_{\text{CP}} = 8.6$  Hz), 134.7 (d, i-Ar,  $^1J_{\text{CP}} = 95.9$  Hz), 167.7 (d, C=O,  $^3J_{\text{CP}} = 4.4$  Hz), 168.2 (d, C=O,  $^3J_{\text{CP}} = 4.4$  Hz). HRMS m/z (+ESI) (M + H)<sup>+</sup> calcd for C<sub>32</sub>H<sub>36</sub>O<sub>5</sub>P<sub>1</sub>Fe<sub>1</sub>: 587.1650, found: 587.1652.

**FD8:** HP procedure of the respective enone produced orange-yellow precipitates. The reaction solvent was removed *via* cannula and solids washed with cold hexanes. Thereafter, 1 equivalent of ClAu.SMe<sub>2</sub> was added and solids dissolved in 5 mL degassed DCM. The solution was left for 24 h in absence of light. Thereafter, the solvent was removed under reduced pressure and crude purified on SiO<sub>2</sub>; silica gel column chromatography (Hexane/E.A); brownish-orange powder; yield: 90%. m.p. 180°C(decomp.);  $^1\text{H}$  NMR ( $\text{CDCl}_3$ , 400 MHz):  $\delta$  2.42 (s, 3H, -Me), 3.39 (s, 1H, Cp), 3.36 - 3.49 (m, 1H, -CH), 3.88 - 4.00 (m, 7H, -CH & 6 Cp), 4.19 (s, 1H, Cp), 4.36 (s, Cp), 4.65 - 4.74 (m, 1H, -CHPPH<sub>2</sub>), 7.27 - 7.35 (m, 4H, -Ar), 7.35 - 7.50 (m, 6H, -Ar), 7.80 - 7.92 (m, 4H, -Ar).  $^{31}\text{P}\{^1\text{H}\}$  NMR ( $\text{CDCl}_3$ , 161.6 MHz):  $\delta$  48.9 (s).  $^{13}\text{C}$  NMR ( $\text{CDCl}_3$ , 100 MHz):  $\delta$  21.9 (-Me), 34.6 (d, -CHPPH<sub>2</sub>,  $^1J_{\text{CP}} = 36.2$  Hz), 41.7(d, -CH<sub>2</sub>,  $^2J_{\text{CP}} = 12.0$  Hz), 67.7 (d, o-Cp,  $^3J_{\text{CP}} = 3.0$  Hz), 67.8 (m-Cp), 68.8 (5 Cp), 69.2 (m-Cp), 70.4 (d, o-Cp), 86.9 (i-Cp), 128.1 (d, i-Ar,  $^1J_{\text{CP}} = 80.1$  Hz), 128.4 (2 m-Ar), 128.6 (d, i-Ar,  $^1J_{\text{CP}} = 86.1$  Hz), 128.7 (d, 2 o-Ar,  $^2J_{\text{CP}} = 11.6$  Hz), 129.3 (d, 2 o-Ar,  $^2J_{\text{CP}} = 11.2$  Hz), 129.7 (2 o-Ar), 132.0 (d, p-Ar,  $^4J_{\text{CP}} = 2.5$  Hz), 132.3 (d, p-Ar,  $^4J_{\text{CP}} = 2.4$  Hz), 132.3 (d, 2 -m Ar,  $^3J_{\text{CP}} = 11.5$  Hz), 133.7 (p-Ar), 134.3 (d, 2 m-Ar,  $^3J_{\text{CP}} = 13.0$  Hz), 134.6 (d, 2 m-Ar,  $^3J_{\text{CP}} = 13.0$  Hz), 145.0 (i-Ar), 196.0 (d, C=O,  $^3J_{\text{CP}} = 9.1$  Hz). HRMS m/z (+ESI) (M + H)<sup>+</sup> calcd for C<sub>32</sub>H<sub>30</sub>O<sub>1</sub>P<sub>1</sub>Cl<sub>1</sub>Fe<sub>1</sub>Au<sub>1</sub>: 749.0738, found: 749.0739.

**FD9:** Similar procedure to FD8; brownish-orange powder; yield: 89%. m.p. 178°C(decomp.);  $^1\text{H}$  NMR ( $\text{CDCl}_3$ , 300 MHz): 3.45 (m, 1H, Cp), 3.53 - 3.92 (m, 2H, - $\text{CH}_2$ ), 4.01 (m, 1H, Cp), 4.12 (m, 5H, Cp), 4.21 (m, 2H, Cp), 4.70 (m, 1H, - $\text{CHPPH}_2$ ), 6.49 (s, 1H, -Ar), 7.34 - 7.69 (m, 8H, -Ar), 7.74 - 7.90 (m, 2H, -Ar), 7.92 - 8.06 (m, 2H, -Ar).  $^{19}\text{F}\{^1\text{H}\}$  NMR ( $\text{CDCl}_3$ , 282.2 MHz):  $\delta$  -62.83 (s), -58.25 (s).  $^{31}\text{P}\{^1\text{H}\}$  NMR ( $\text{CDCl}_3$ , 161.6 MHz):  $\delta$  52.5 (s).  $^{13}\text{C}$  NMR ( $\text{CDCl}_3$ , 100 MHz):  $\delta$  32.7 (d, - $\text{CHPPH}_2$ ,  $^1J_{\text{CP}} = 34.6$  Hz), 47.2(d, - $\text{CH}_2$ ,  $^2J_{\text{CP}} = 12.7$  Hz), 67.6 (d, *o*-Cp,  $^3J_{\text{CP}} = 4.4$  Hz), 68.1 (*m*-Cp), 68.8 (5Cp), 69.4 (*m*-Cp), 69.8 (d, *o*-Cp,  $^3J_{\text{CP}} = 1.9$  Hz), 86.8 (d, *i*-Cp,  $^2J_{\text{CP}} = 7.3$  Hz), 122.7 (q,  $\text{CF}_3$ ,  $^1J_{\text{CF}} = 273.4$  Hz), 122.9 (q,  $\text{CF}_3$ ,  $^1J_{\text{CF}} = 274.2$  Hz), 123.9(m, *p*-Ar), 127.5 (d, *i*-Ar,  $^1J_{\text{CP}} = 74.3$  Hz), 127.6 (m, *m*-Ar), 127.8 (m, *m*-Ar), 128.1 (d, *i*-Ar,  $^1J_{\text{CP}} = 81.4$  Hz), 128.9 (d, 2 *o*-Ar,  $^2J_{\text{CP}} = 11.8$ Hz), 129.6 (d, 2 *o*-Ar,  $^2J_{\text{CP}} = 11.1$  Hz), 130.2 (q, *m*-Ar,  $^2J_{\text{CF}} = 32.8$  Hz), 132.4 (d, *p*-Ar,  $^4J_{\text{CP}} = 2.5$  Hz), 133.0 (d, *p*-Ar,  $^4J_{\text{CP}} = 2.2$  Hz), 134.4 (q, *m*-Ar,  $^2J_{\text{CF}} = 33.0$  Hz), 134.6 (d, 2 -*m* Ar,  $^3J_{\text{CP}} = 13.3$  Hz), 135.2 (d, 2 -*m* Ar,  $^3J_{\text{CP}} = 13.8$  Hz), 140.3 (s, *i*-Ar), 141.2 (*i*-Ar), 199.2 (d, C=O,  $^3J_{\text{CP}} = 4.6$  Hz). HRMS  $m/z$  (+ESI) ( $\text{M} + \text{H}$ ) $^+$  calcd for  $\text{C}_{33}\text{H}_{26}\text{O}_1\text{P}_1\text{Cl}_1\text{Fe}_1\text{Au}_1\text{F}_6$ : 871.0329, found: 871.0333.

**FD10:** Similar procedure to FD8; brownish-orange powder; yield: 95%. m.p. 119°C(decomp.);  $^1\text{H}$  NMR ( $\text{CDCl}_3$ , 400 MHz):  $\delta$  3.30 - 3.48 (m, 2H, Cp & CH), 3.74 - 3.88 (m, 1H, -CH), 3.95 (m, 1H, Cp), 3.98 (s, 5H, Cp), 4.21 (s, 1H, Cp), 4.36 (s, 1H, Cp), 4.53 - 4.64 (m, 1H, - $\text{CHPPH}_2$ ), 6.56 (m, 1H, -thienyl CH), 7.25 (m, 1H, -thienyl CH), 7.30 - 7.54 (m, 8H, -Ar), 7.46 - 7.56 (m, 2H, -Ar), 7.63 (m, 1H, -thienyl CH), 7.83 - 7.92 (m, 2H, -Ar).  $^{31}\text{P}\{^1\text{H}\}$  NMR ( $\text{CDCl}_3$ , 161.6 MHz):  $\delta$  49.0 (s).  $^{13}\text{C}$  NMR ( $\text{CDCl}_3$ , 100 MHz):  $\delta$  32.9 (d, - $\text{CHPPH}_2$ ,  $^1J_{\text{CP}} = 35.6$  Hz), 41.3 (d, - $\text{CH}_2$ ,  $^2J_{\text{CP}} = 11.9$  Hz), 67.6 (d, *o*-Cp,  $^3J_{\text{CP}} = 4.4$  Hz), 67.8 (*m*-Cp), 68.3 (5Cp), 69.2 (*m*-Cp), 70.1 (d, *o*-Cp,  $^3J_{\text{CP}} = 1.9$  Hz), 86.6 (d, *i*-Cp,  $^2J_{\text{CP}} = 6.9$  Hz), 112.8 (furyl Ar), 118.1 (furyl Ar), 127.8 (d, *i*-Ar,  $^1J_{\text{CP}} = 72.5$  Hz), 128.4 (d, *i*-Ar,  $^1J_{\text{CP}} = 78.6$  Hz), 128.7 (d, 2 *o*-Ar,  $^3J_{\text{CP}} = 11.6$  Hz), 129.2 (d, 2 *o*-Ar,  $^3J_{\text{CP}} = 11.2$  Hz), 132.1 (d, *p*-Ar,  $^4J_{\text{CP}} = 2.7$  Hz), 132.3 (d, *p*-Ar,  $^4J_{\text{CP}} = 2.6$  Hz), 134.4 (d, 2 *m*-Ar,  $^2J_{\text{CP}} = 13.1$  Hz), 134.6 (d, 2 *m*-Ar,  $^2J_{\text{CP}} = 13.2$  Hz), 147.1 (furyl Ar), 152.1 (furyl Ar), 185.6 (d, C=O,  $^3J_{\text{CP}} = 8.9$  Hz). HRMS  $m/z$  (+ESI) ( $\text{M} + \text{H}$ ) $^+$  calcd for  $\text{C}_{29}\text{H}_{26}\text{O}_2\text{P}_1\text{Cl}_1\text{Fe}_1\text{Au}_1$ : 725.0374, found: 725.0370.

The solid gold complexes may be kept over a year under ambient conditions without signs of decomposition. The chemical structure of **FD10** has been verified by  $^1\text{H}$ ,  $^{13}\text{C}$  NMR and HRMS. Since no other phosphine species was observed in the  $^{31}\text{P}\{^1\text{H}\}$  NMR in DMSO, we find that the synthesized gold compound **FD10** is verifiably stable in the DMSO solution. While, we do not have absolute evidence of Gold(I) being leached in cytoplasmic environment as aggregates or nanoparticles, it might be a possible mechanism of action of the drug as Gold(I) complexes may undergo ligand exchange with biological ligands in cells.

## II. $^1\text{H}$ , $^{31}\text{P}\{^1\text{H}\}$ , $^{19}\text{F}\{^1\text{H}\}$ & $^{13}\text{C}$ Spectra of FD1-FD10 compounds

FD1.  
CDCl<sub>3</sub>  
 $^1\text{H}$

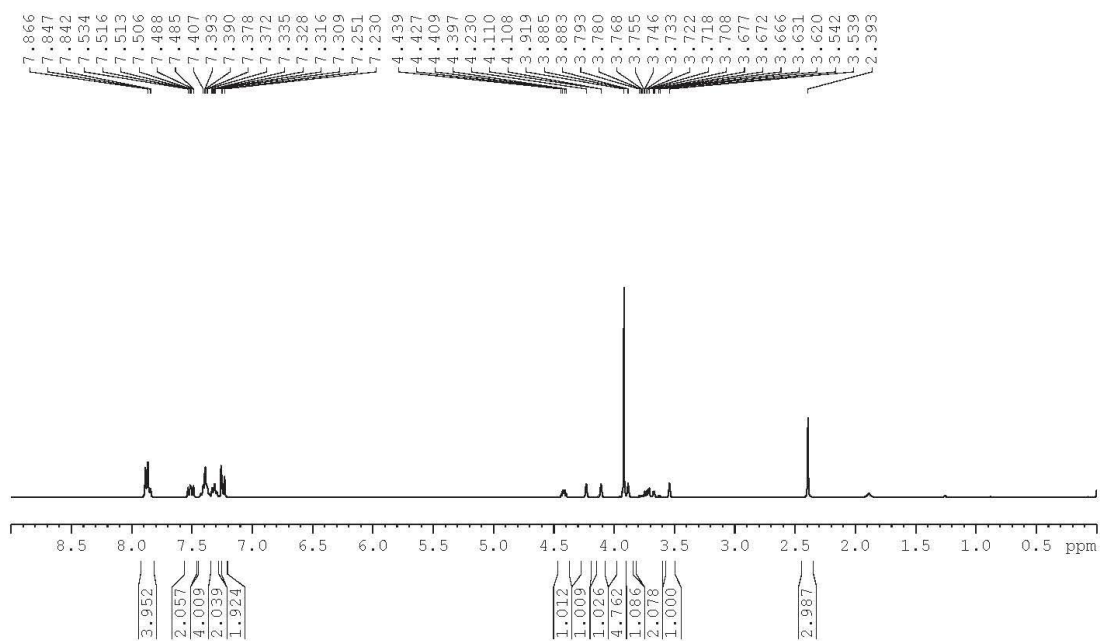

FD1.  
CDCl<sub>3</sub>  
 $^{31}\text{P}$

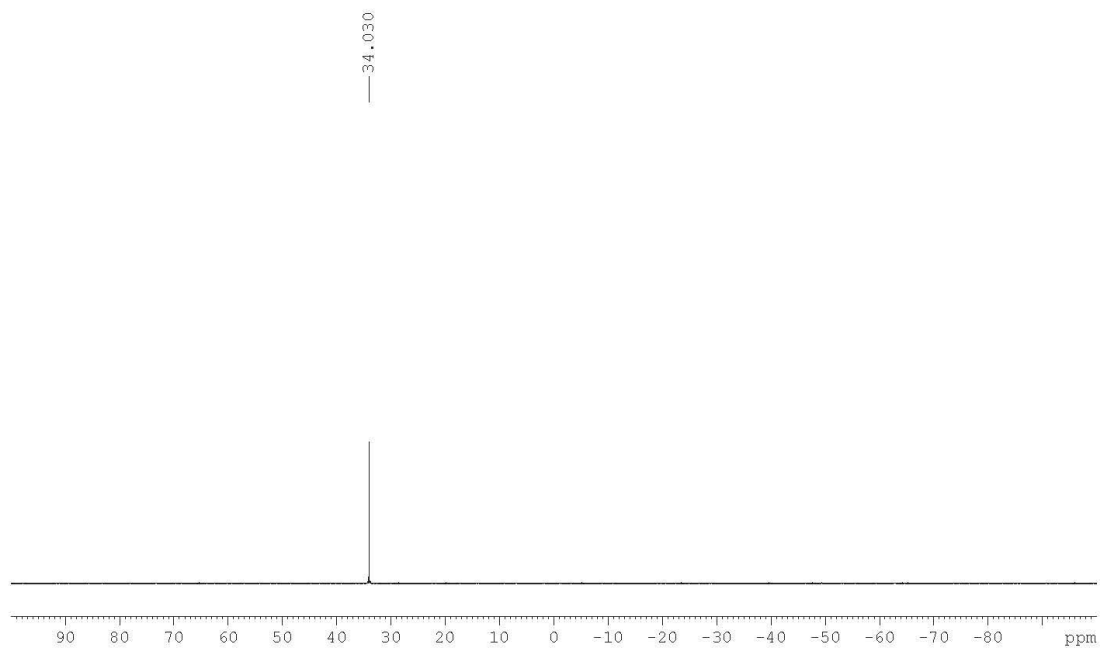

FD1.  
CDCl<sub>3</sub>  
13C

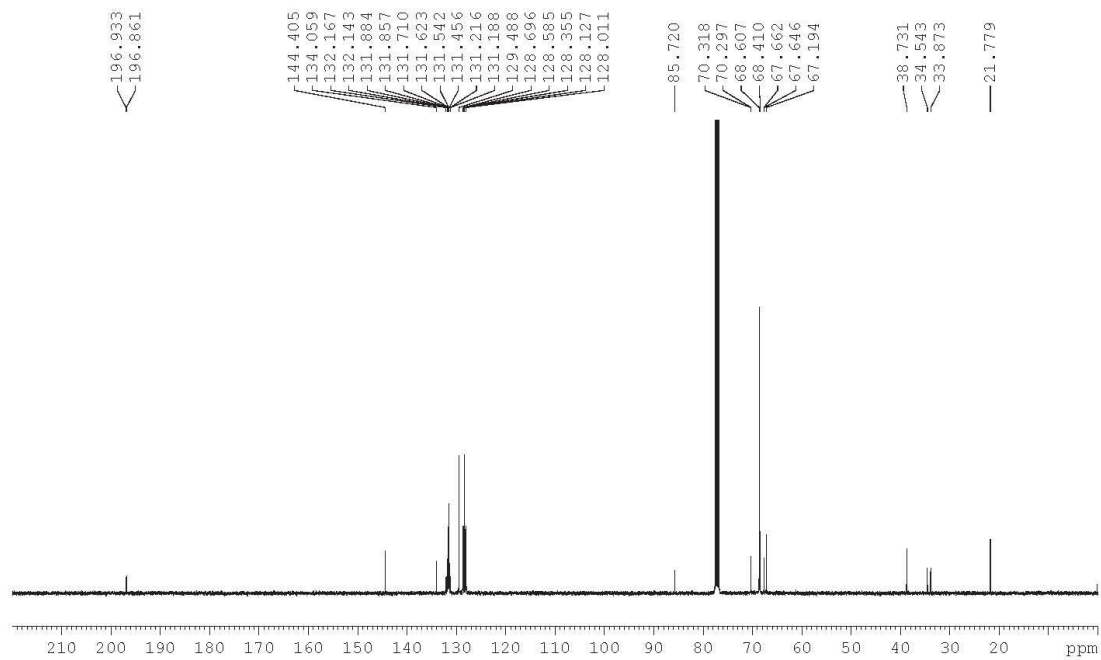

FD2.  
CDCl<sub>3</sub>  
1H

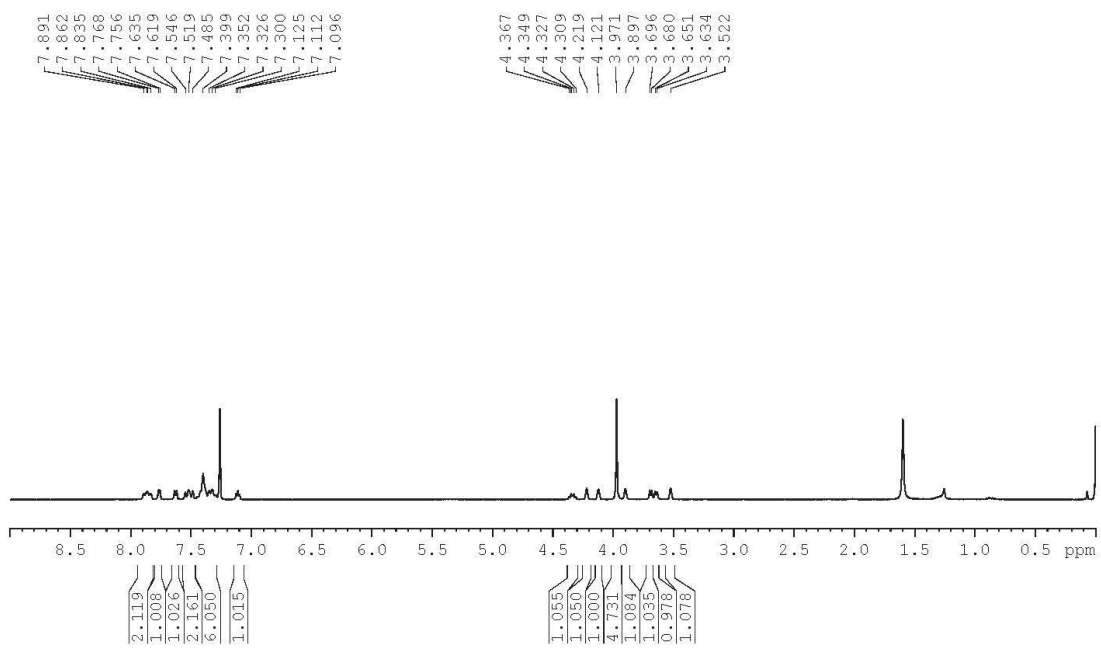

FD2.  
CDCl3  
31P{1H}

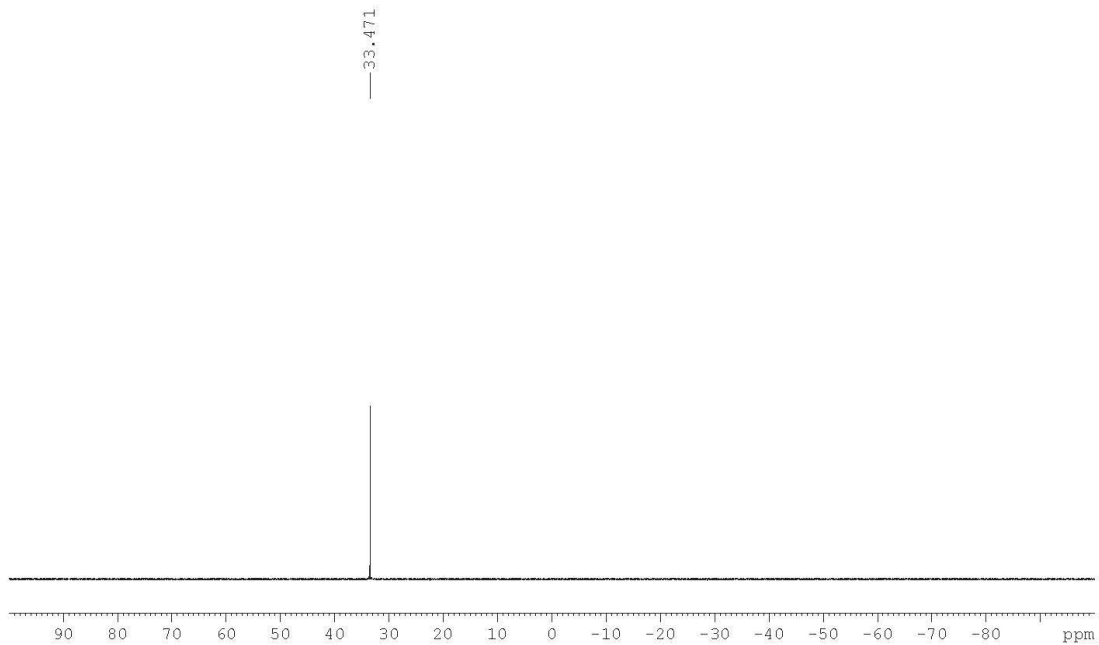

FD2.  
CDCl3  
13C

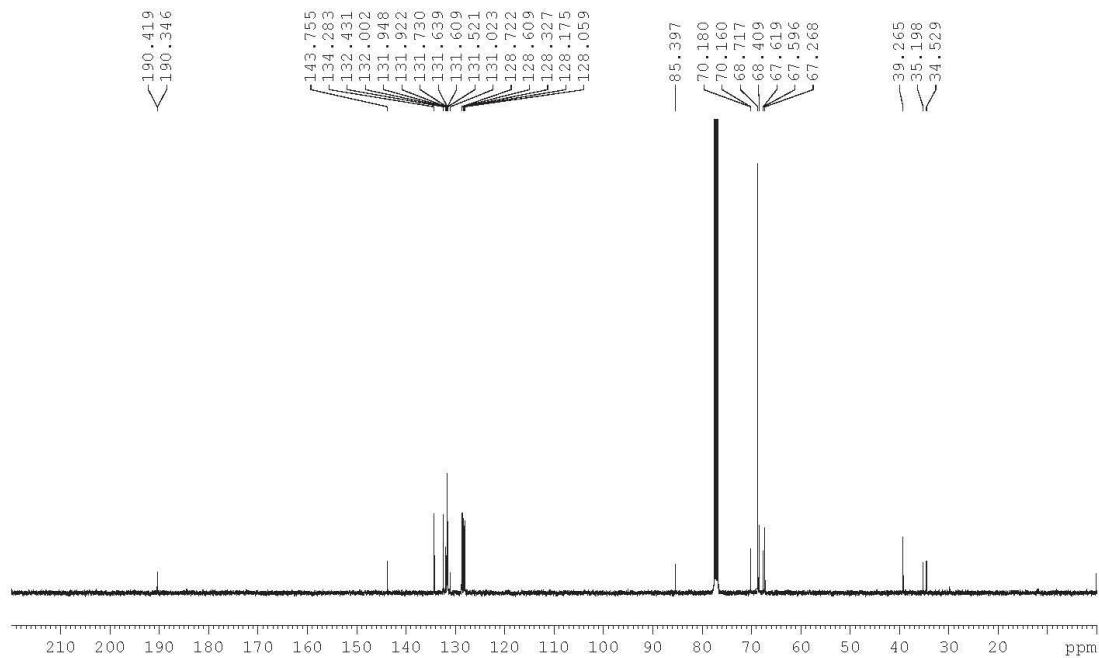

FD3.  
CDCl3  
1H

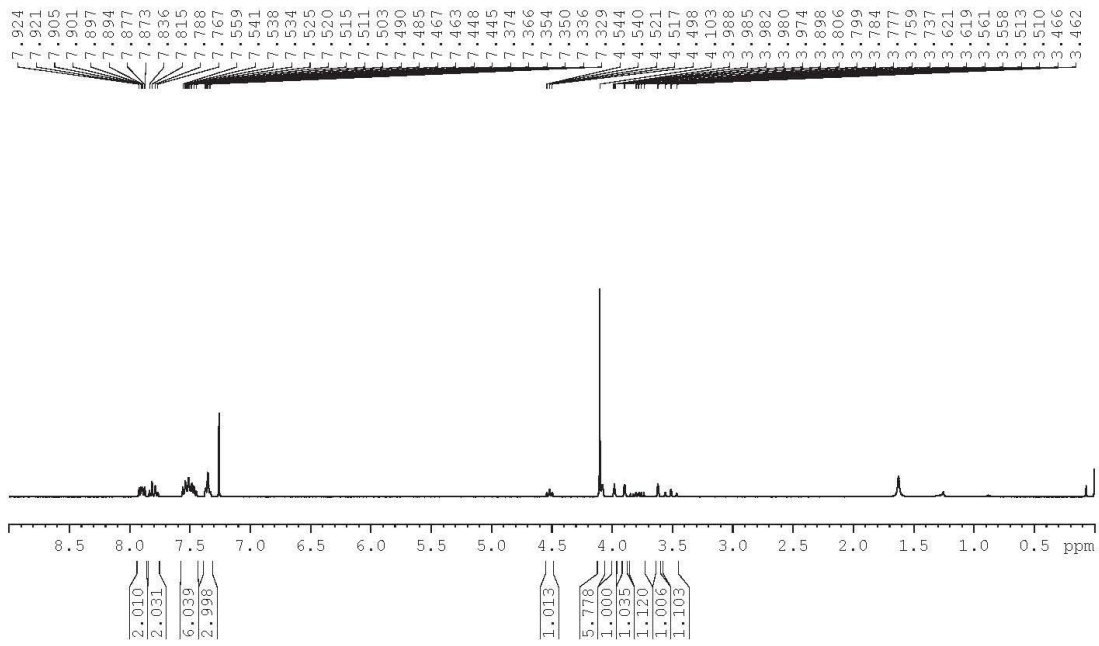

FD3.  
CDCl3  
19F(1H)

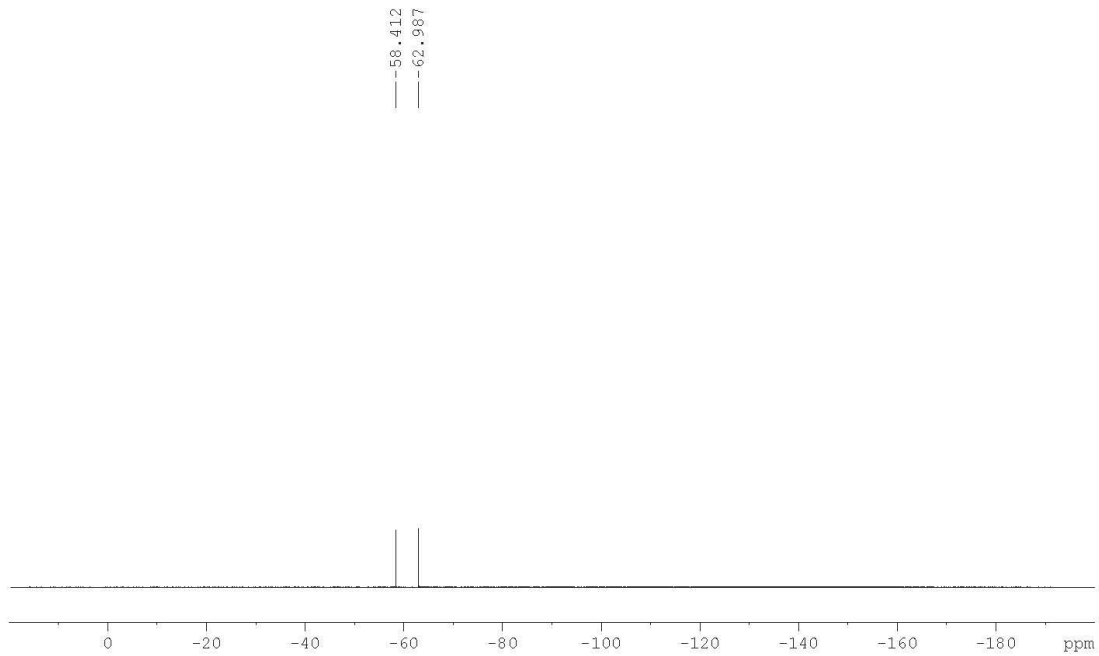



FD3.  
CDCl3  
31P{1H}

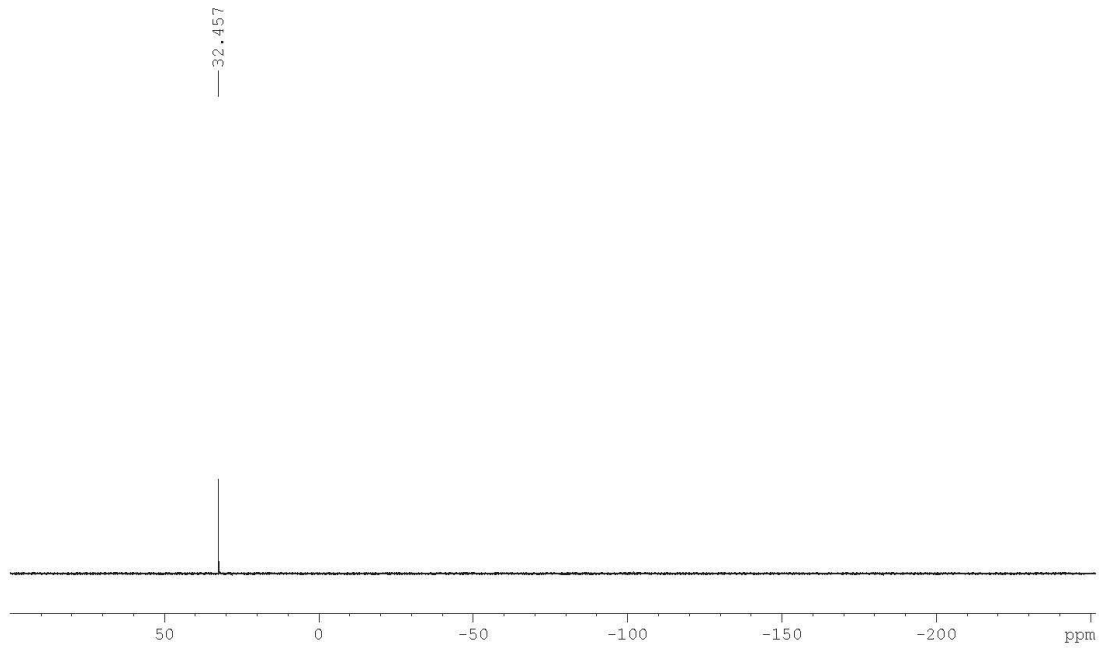

FD3.  
CDCl3  
13C

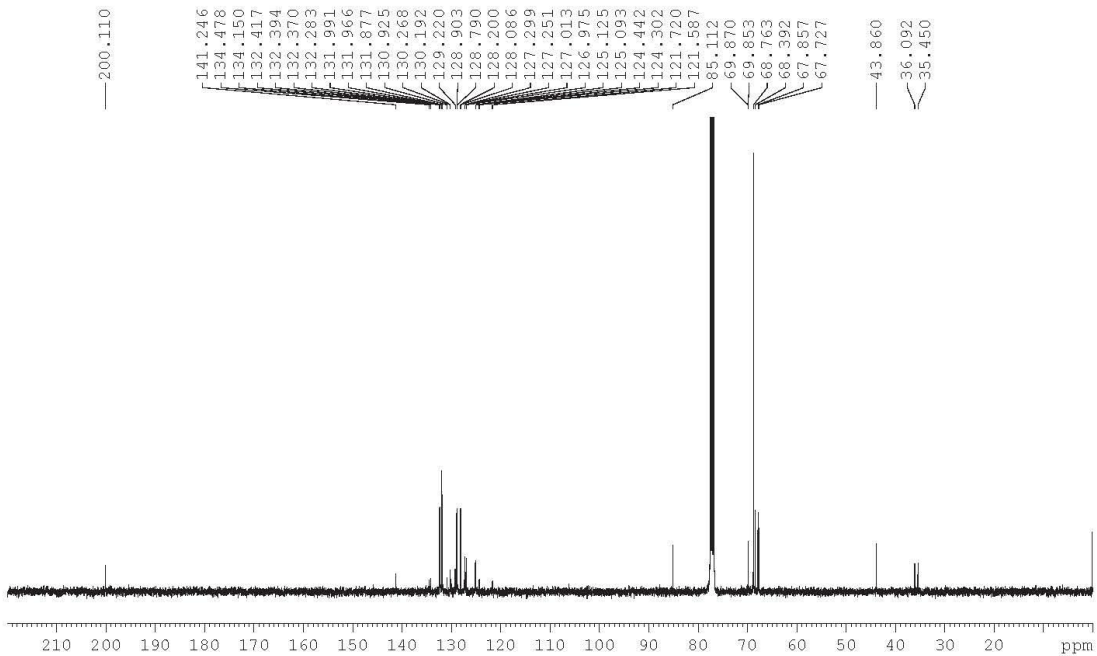

FD4  
CDCl3  
1H

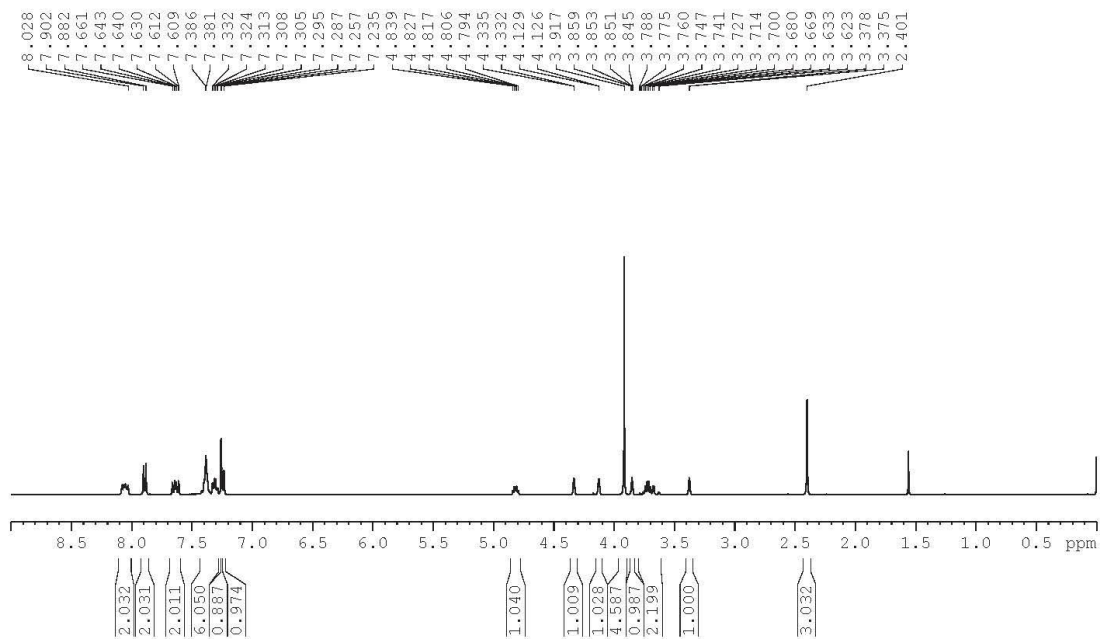

FD4  
CDCl3  
31P{1H}

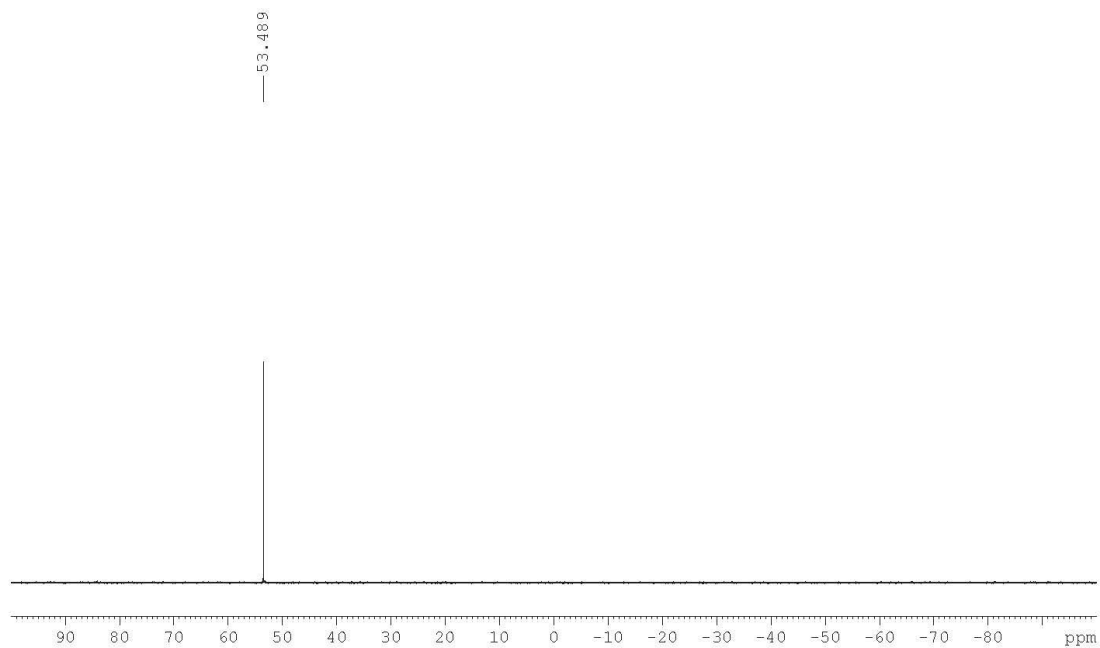

FD4  
CDCl3  
13C

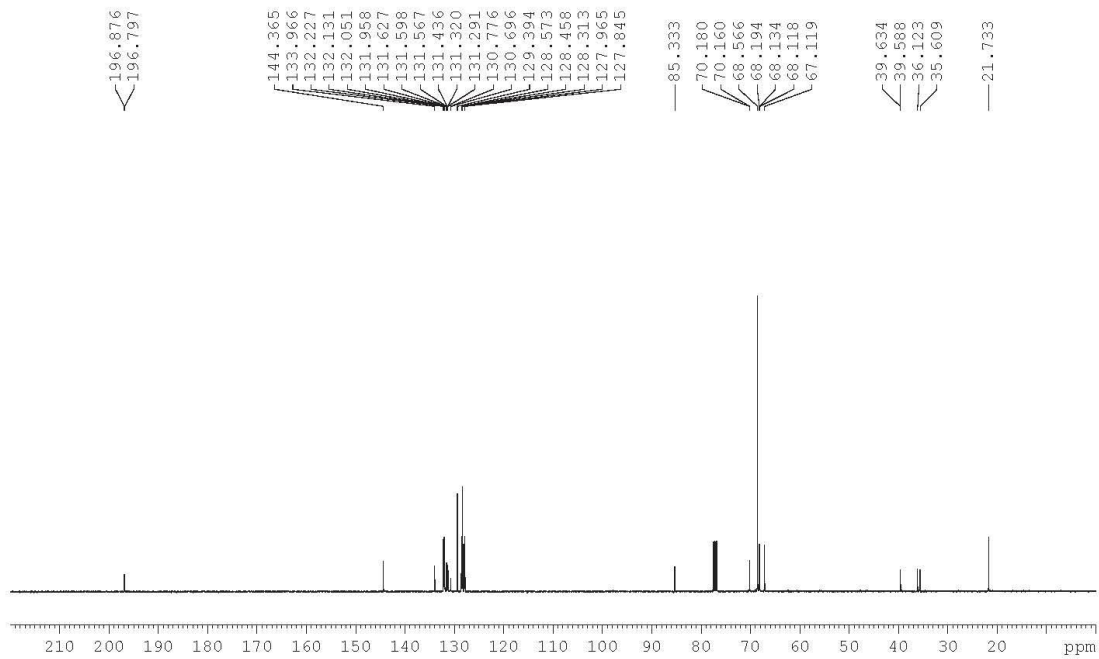

FD5  
CDCl3  
1H

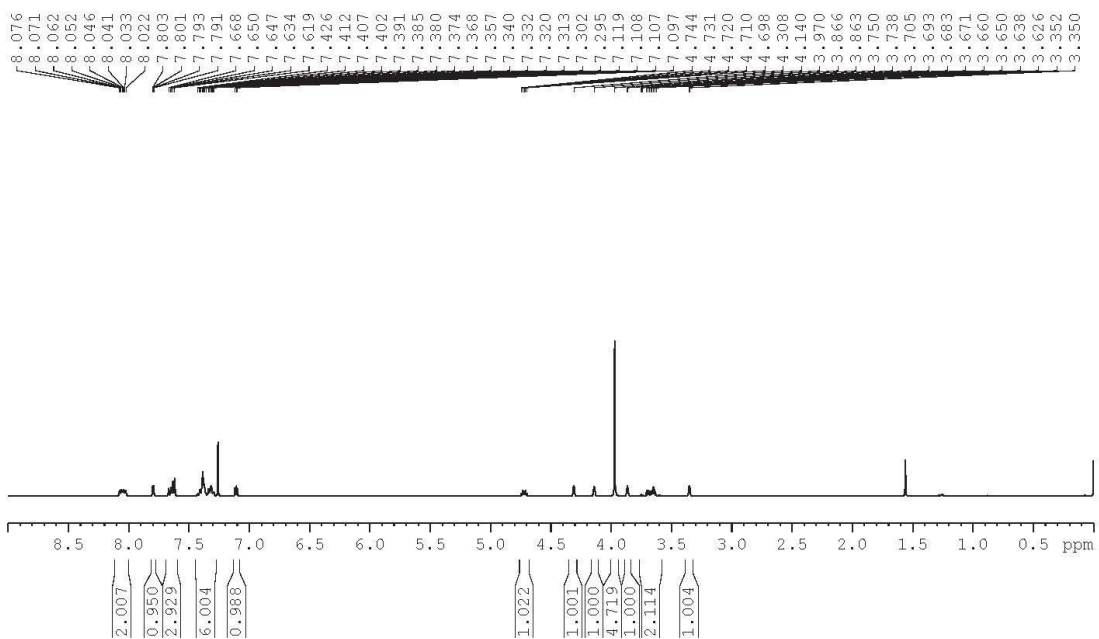

FD5  
CDCl3  
31P{1H}

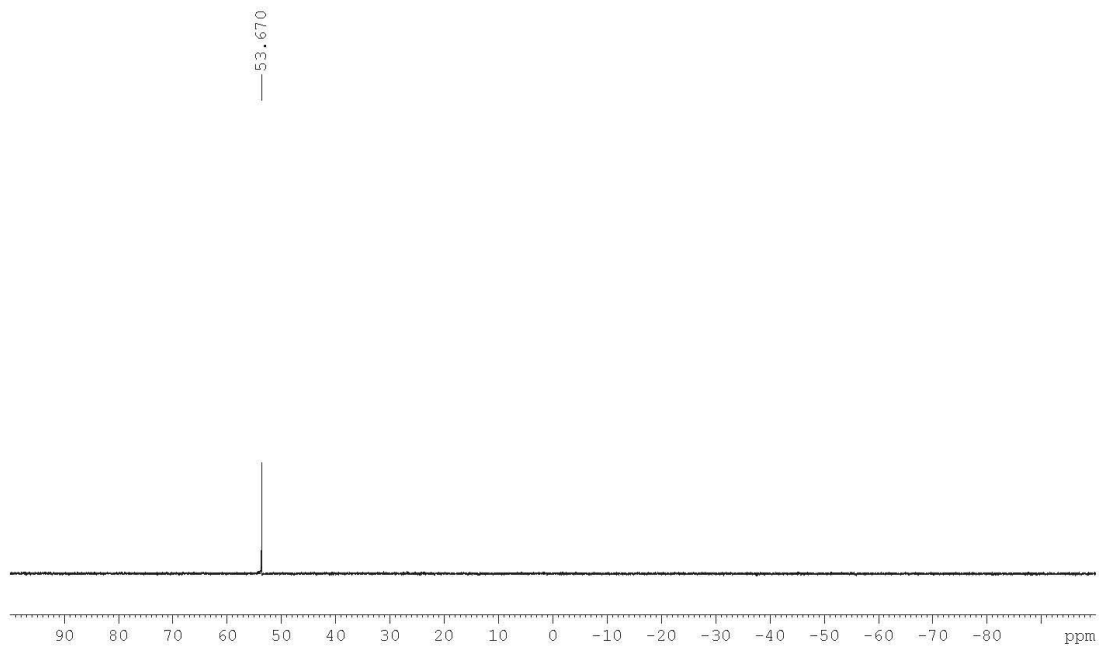

FD5  
CDCl3  
13C

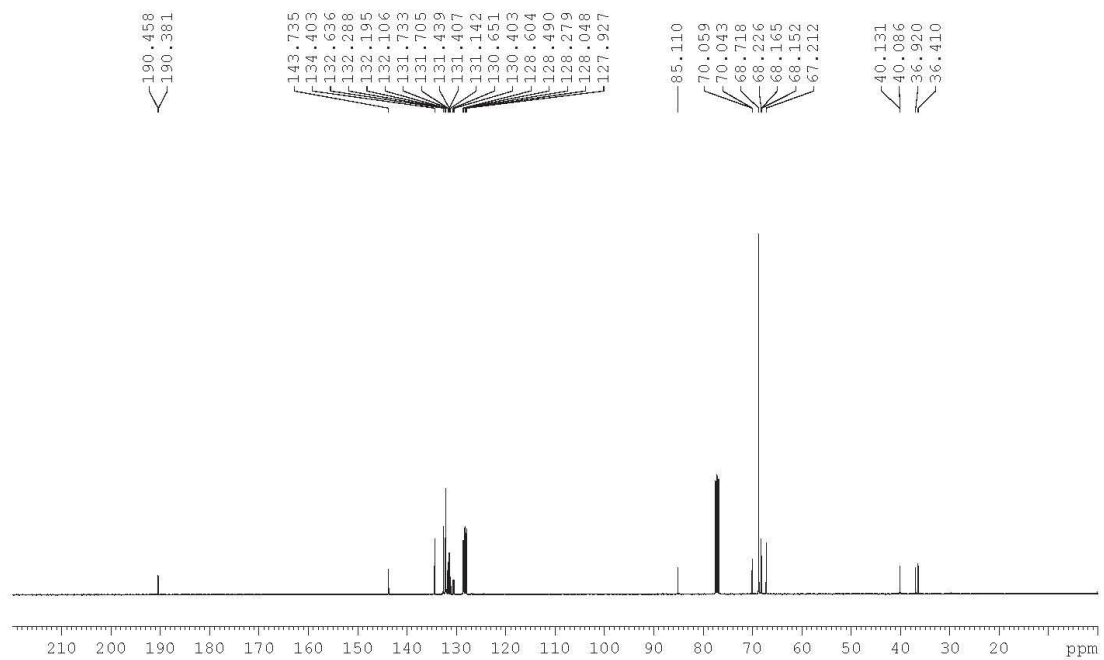

FD6.  
CDCl3  
1H

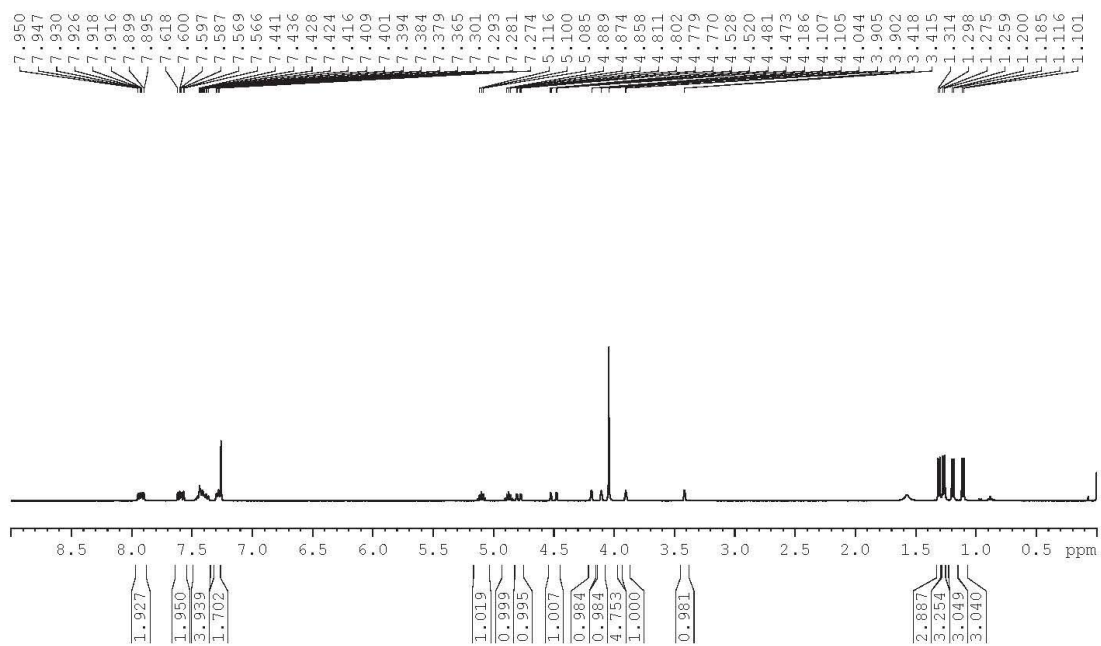

FD6.  
CDCl3  
31P{1H}

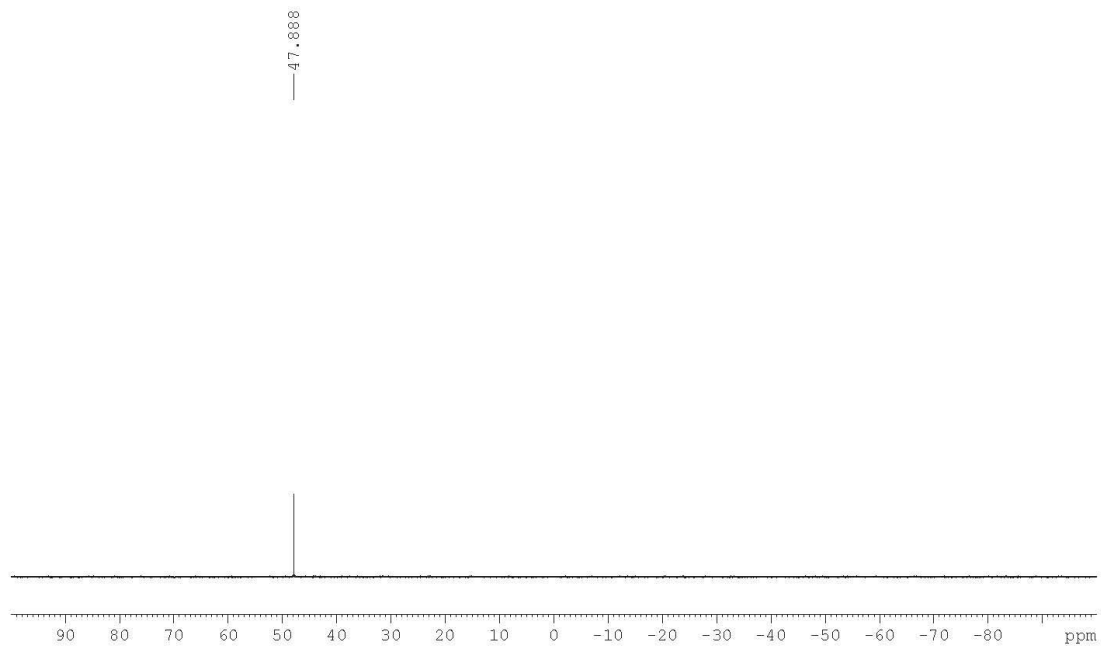

FD6.  
CDCl<sub>3</sub>  
13C

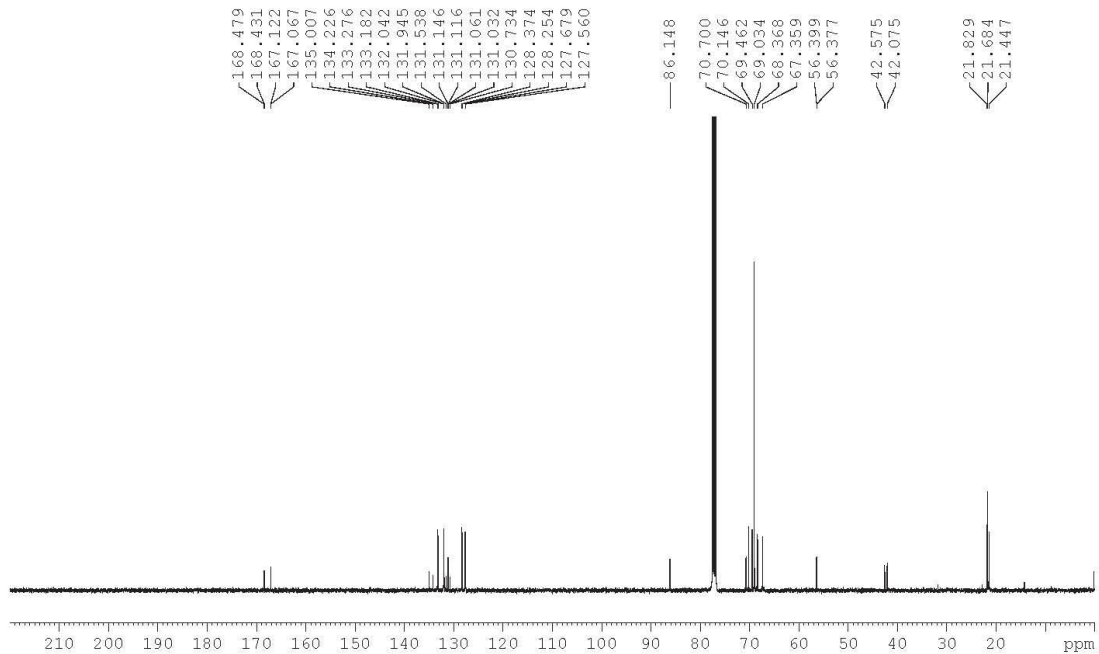

FD7.  
CDCl<sub>3</sub>  
1H

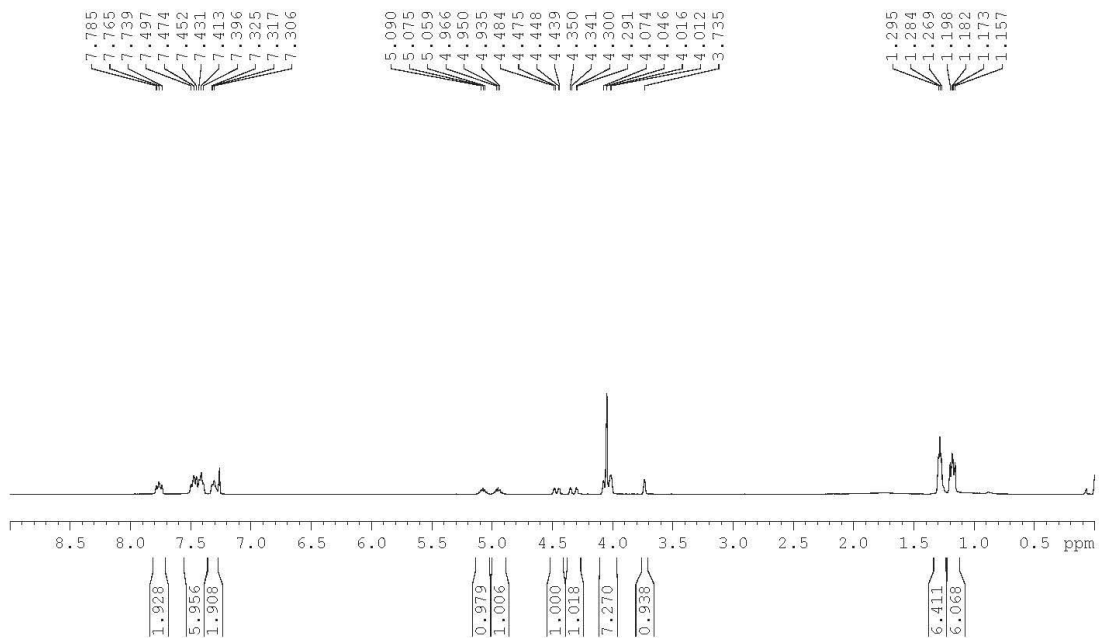

FD8  
1H, CDCl3

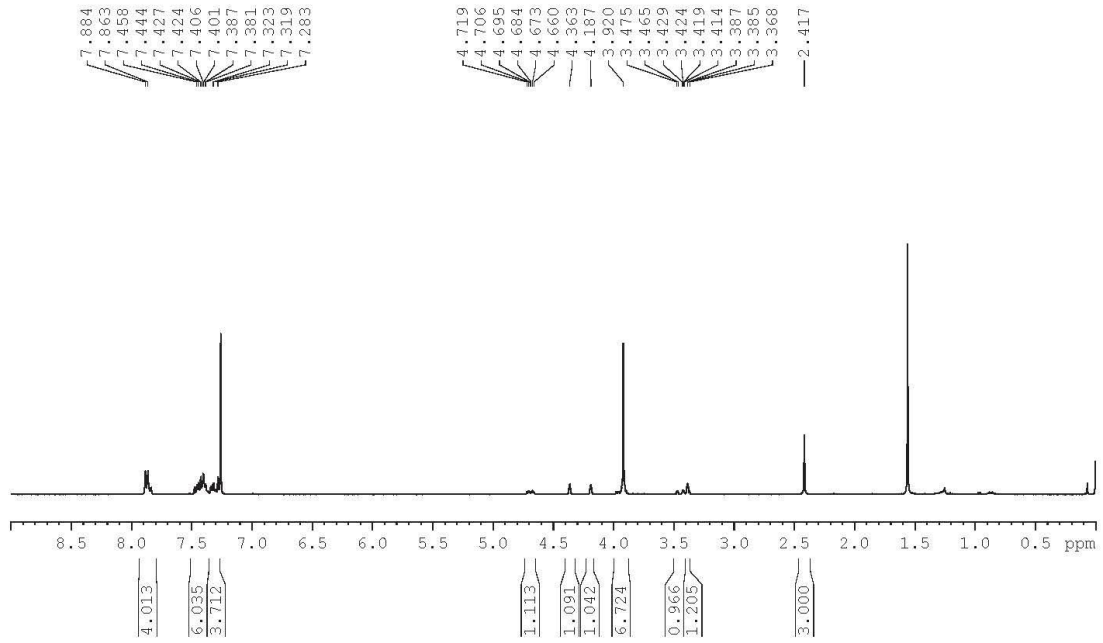

FD8  
31P, CDCl3

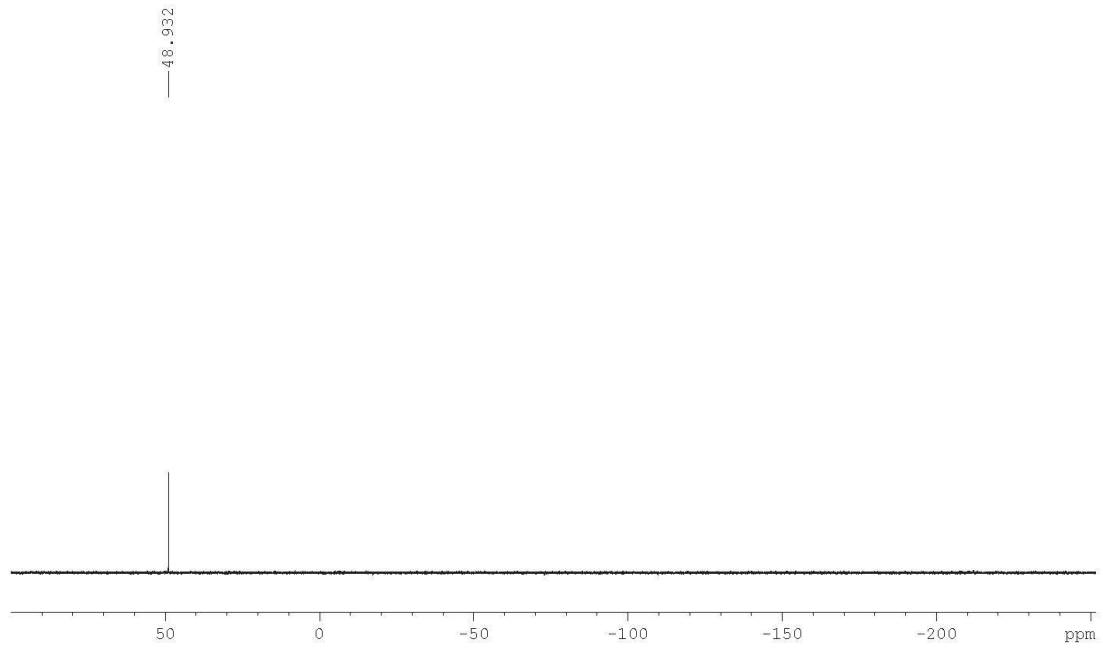

FD8.  
CDCl<sub>3</sub>  
13C

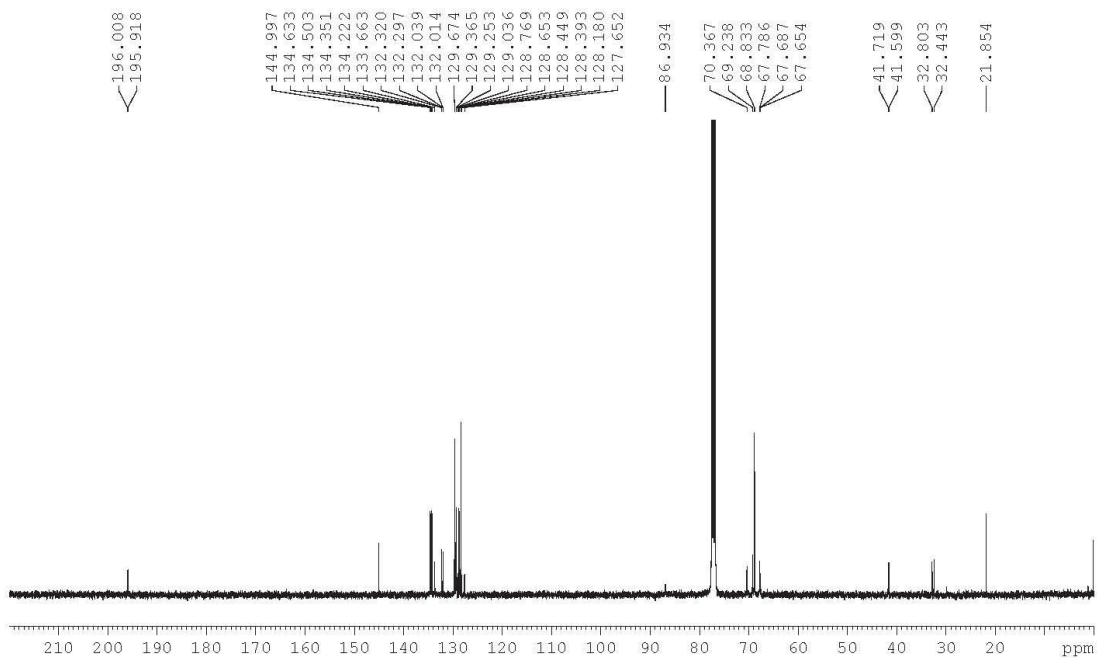

FD9.  
CDCl<sub>3</sub>  
1H

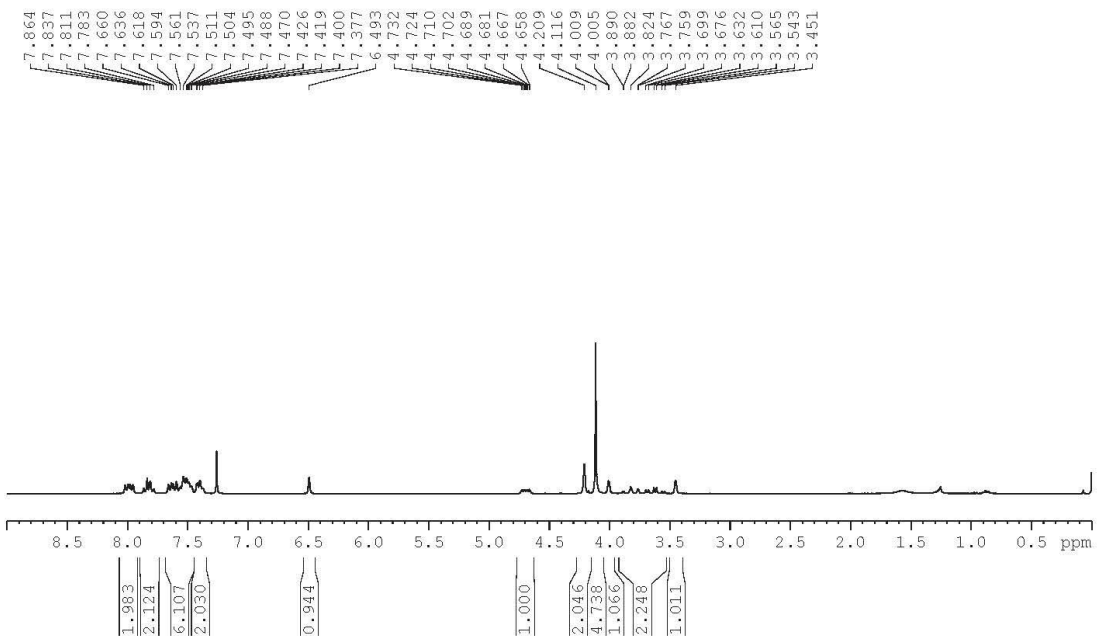



FD9,  
CDCl3  
31P{1H}

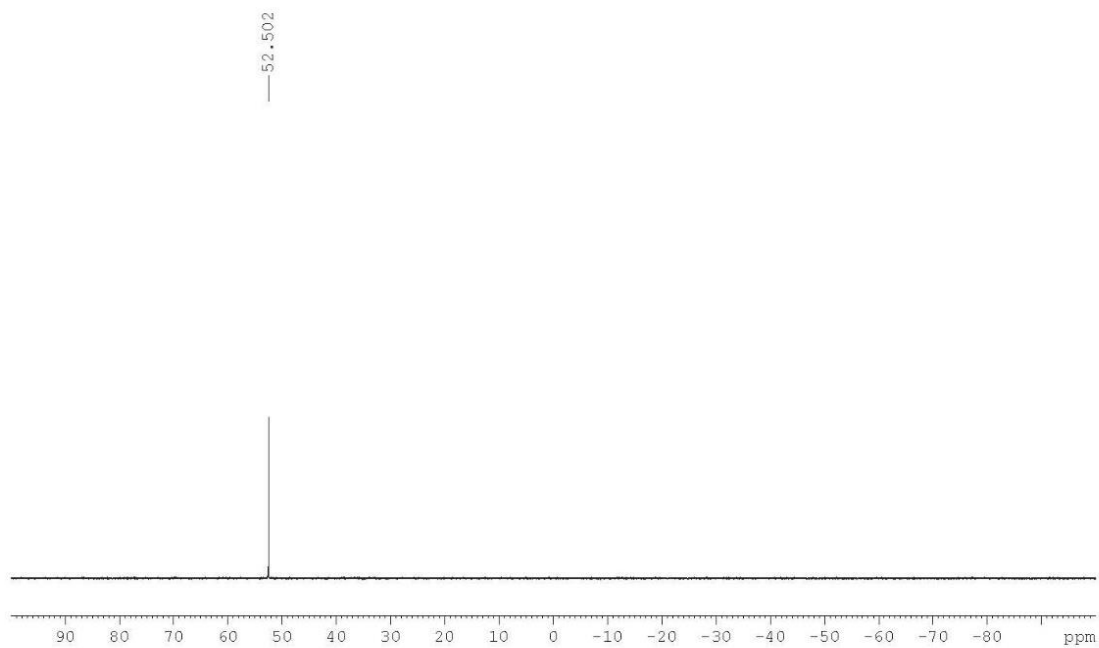

FD9,  
CDCl3  
19F{1H}

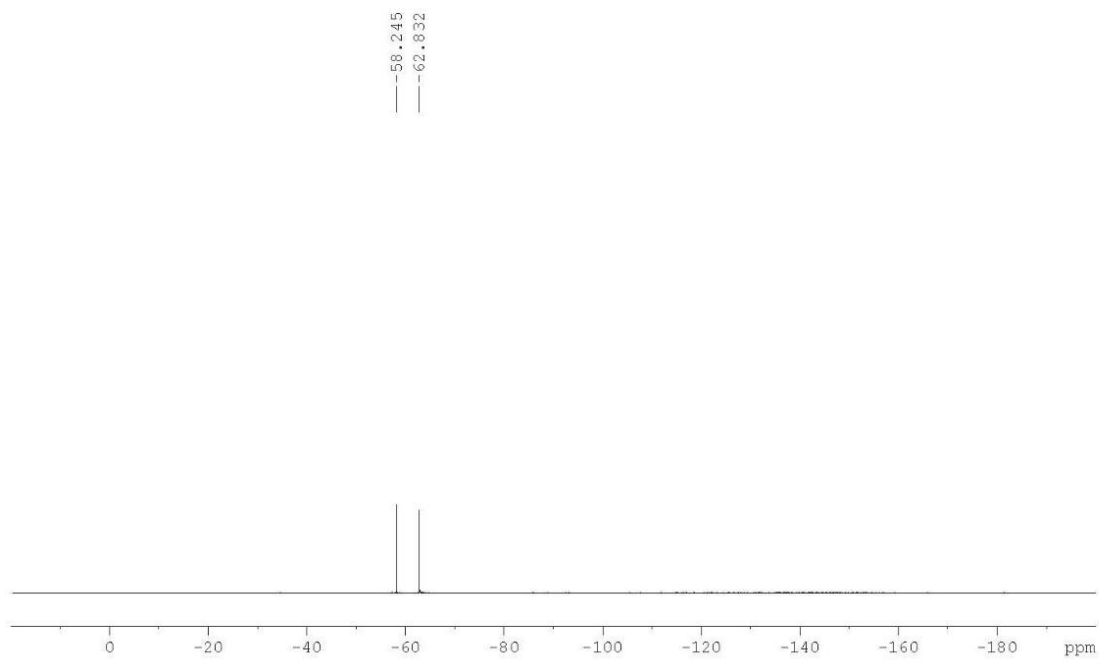

FD9.  
CDCl<sub>3</sub>  
13C

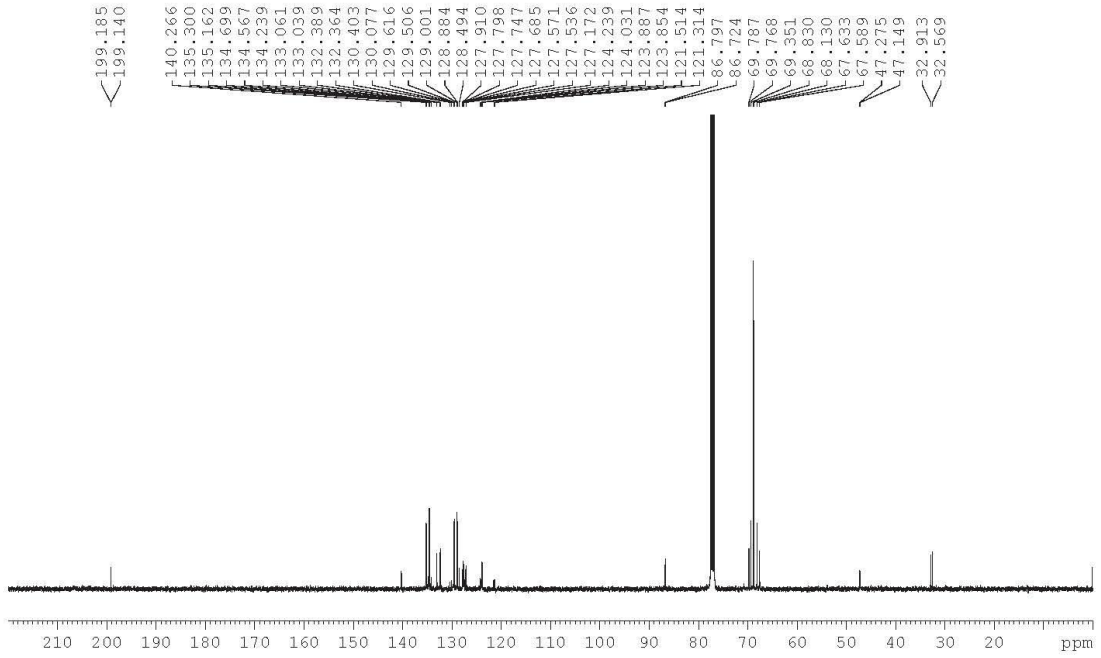

FD10.  
CDCl<sub>3</sub>  
1H

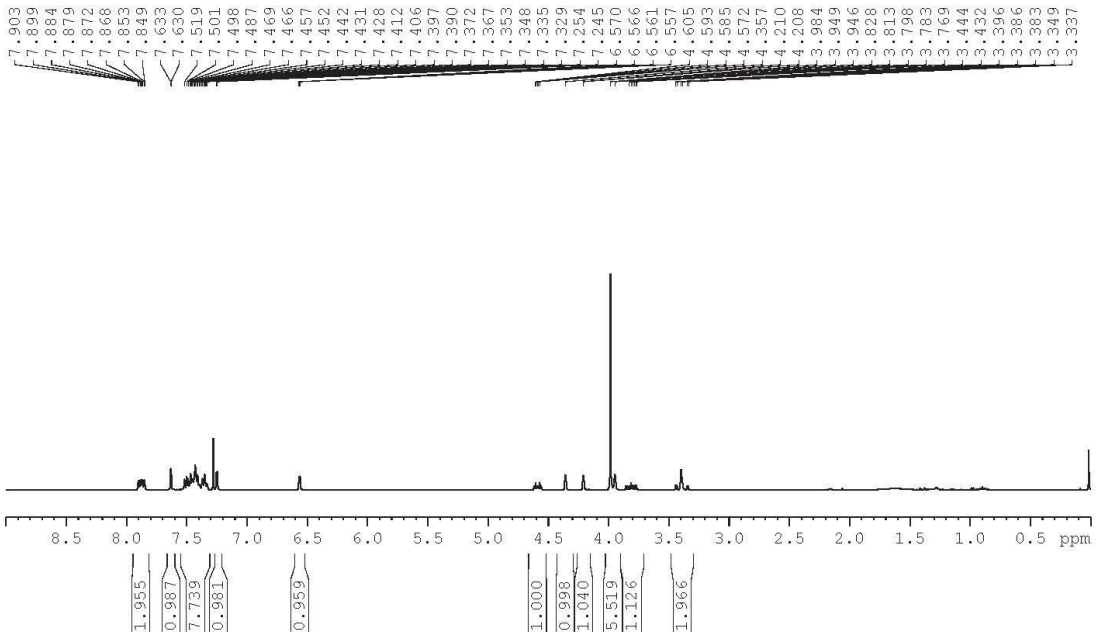

FD10,  
CDCl<sub>3</sub>  
31P{1H}

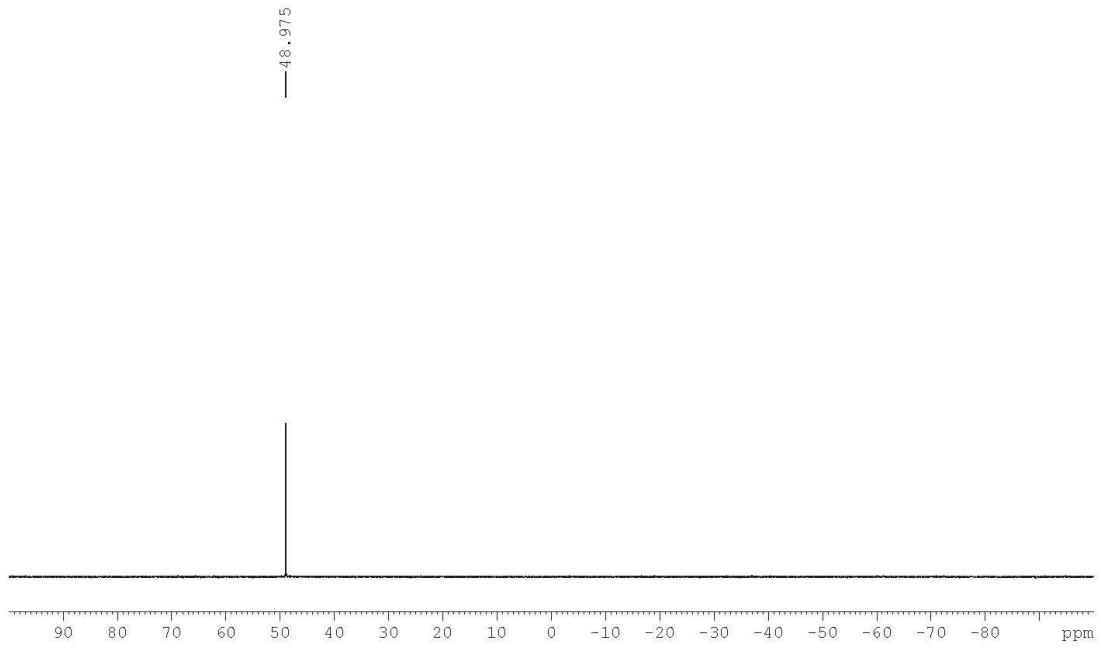

FD10,  
CDCl<sub>3</sub>  
13C

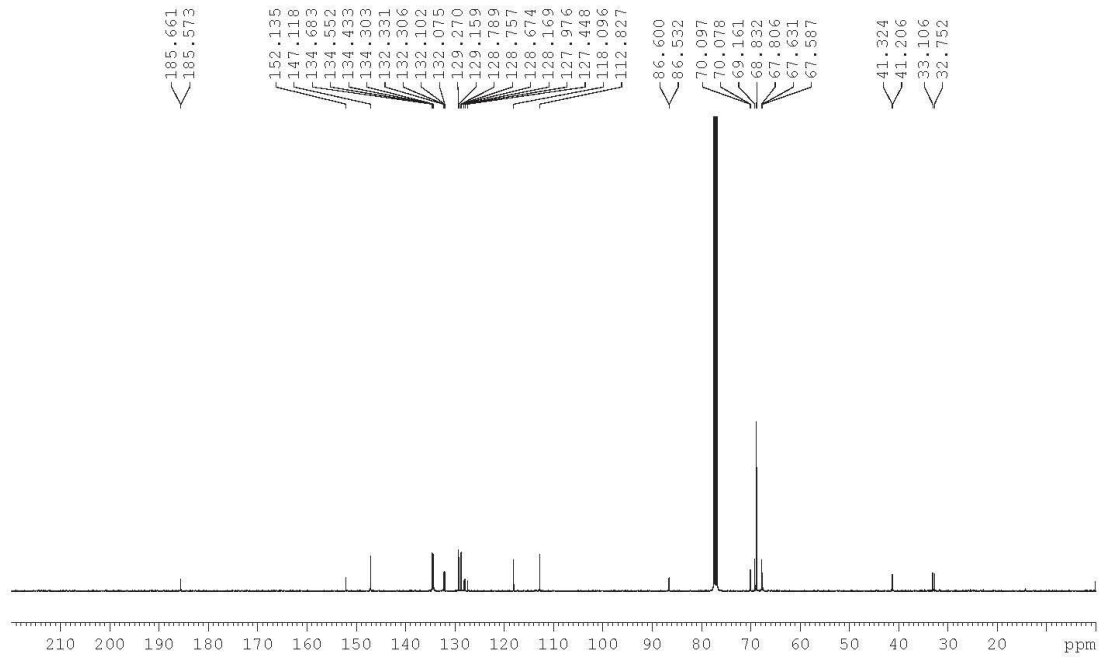

FD10  
DMSO  
31P{1H}

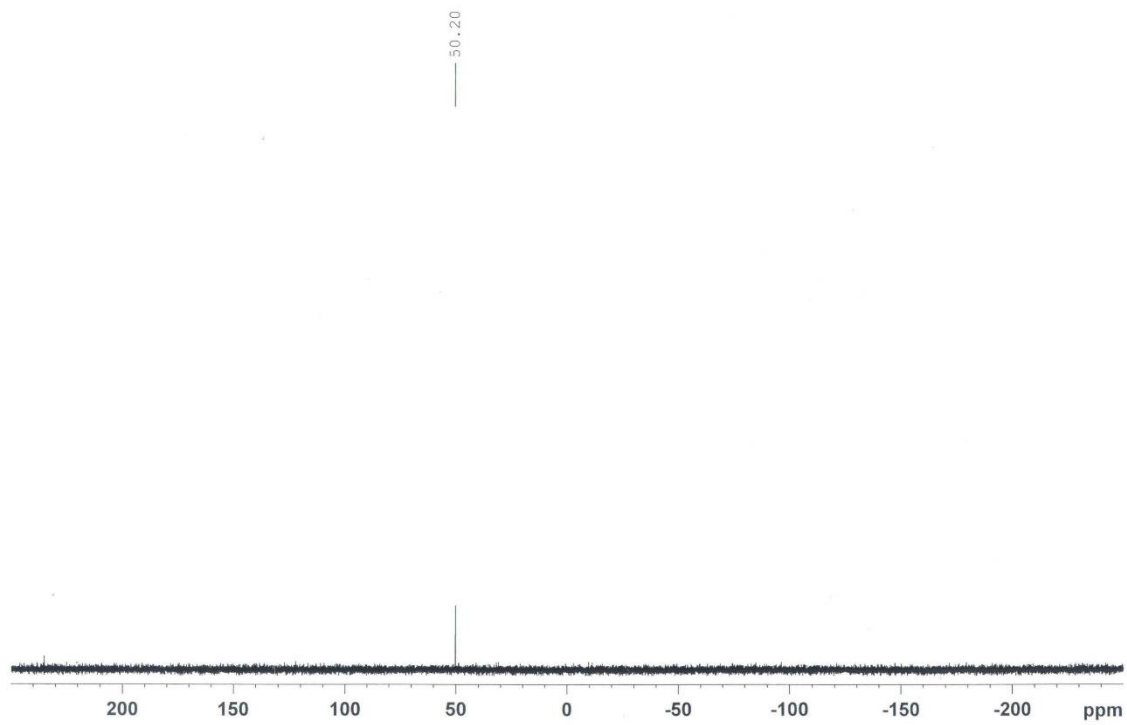

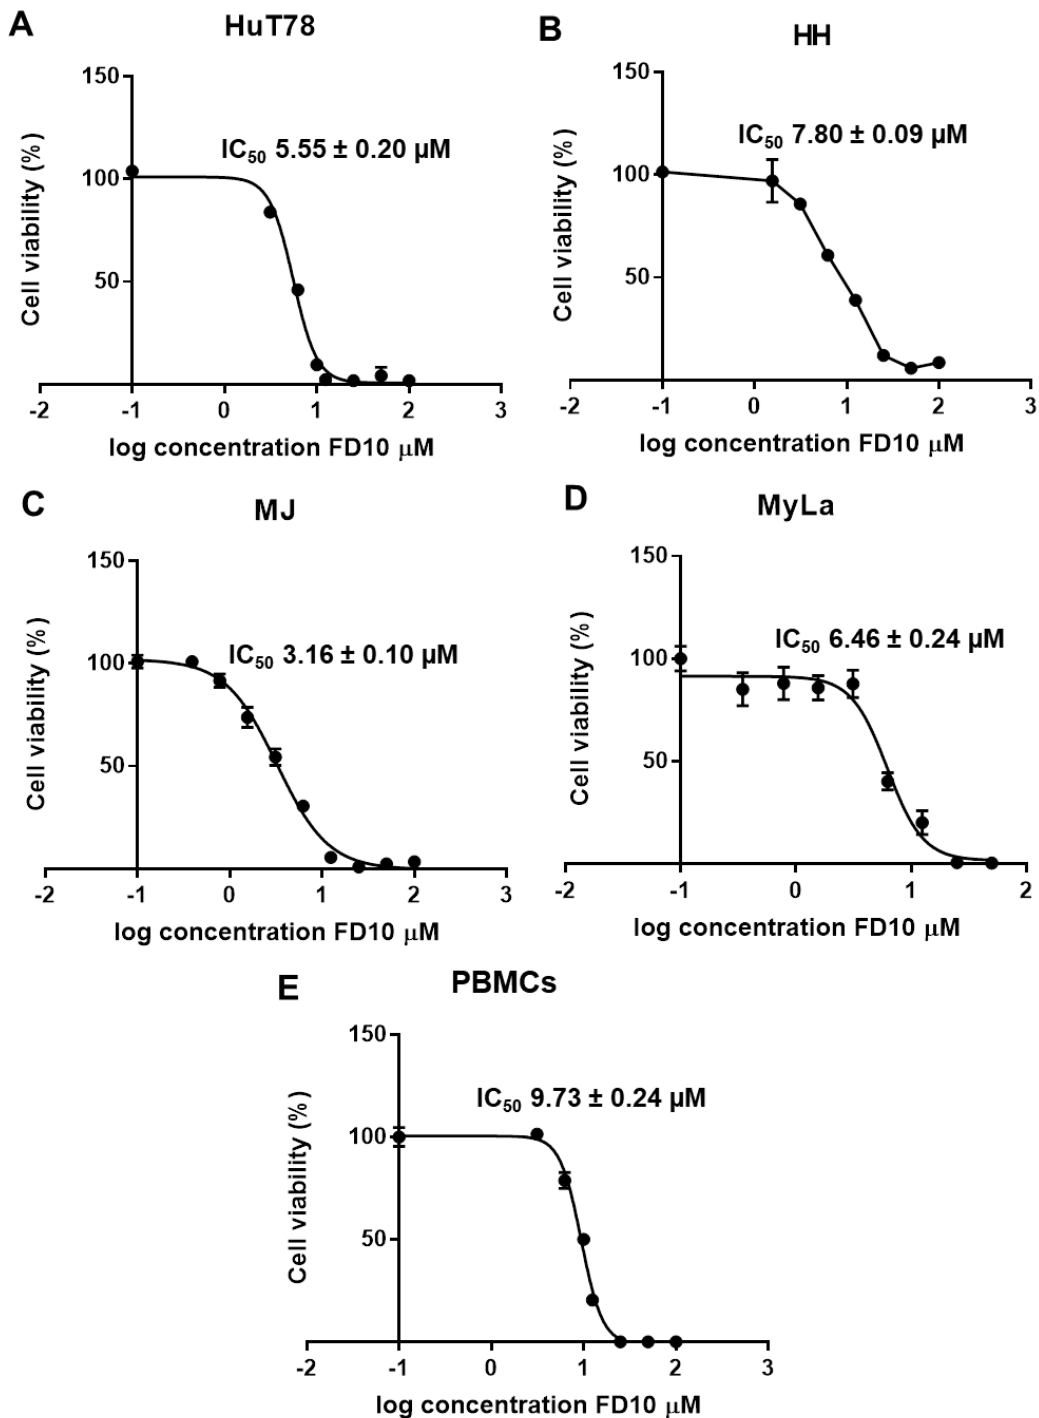

**Figure S1.** Cell viability graph indicating  $IC_{50}$  values of **FD10** in Hut78 **(A)**, HH **(B)**, MJ **(C)**, MyLa **(D)** and PBMCs **(E)**. Cells were treated with increasing concentrations of FD10 (1 – 100  $\mu M$ ) in triplicates for 24 h and cell viability percentage (%) was determined by MTS-based assay. Values were plotted using GraphPad Prism software and  $IC_{50}$  values were determined as indicated in the graphs. Data represents at least 3 independent experiments.
